# Supplementary material for: Tuning the reactivity of an yttrium complex bearing a functionalized silylamido ligand using solvated KCl
Source: Royal Society of Chemistry journal article supplement (doi:10.1039/d4qi01882f), 2024-01-01
Supplement: d4qi01882f1.pdf [file d4qi01882f1.pdf]

## Supporting Information

### **Tuning Reactivity of Yttrium Complex Bearing a Functionalized Silylamido Ligand Using Solvated KCl**

Qing You,<sup>‡a</sup> Jiamin Cai,<sup>‡a</sup> Jie Zhang<sup>\*a</sup> and Xigeng Zhou<sup>\*a</sup>

<sup>a</sup> Department of Chemistry, Fudan University Handan Road No 220, Shanghai  
200433 (China)

E-mail: [zhangjie@fudan.edu.cn](mailto:zhangjie@fudan.edu.cn); [xgzhou@fudan.edu.cn](mailto:xgzhou@fudan.edu.cn)

<sup>‡</sup> These authors contributed equally to this work.

## Table of Contents

|                                                              |         |
|--------------------------------------------------------------|---------|
| 1. Experimental Procedures .....                             | S3-S6   |
| 2. Computational Details .....                               | S6-S7   |
| 3. X-ray Crystallographic Analysis of All new Complexes..... | S8-S10  |
| 4. NMR Spectra of All New Compounds.....                     | S11-S19 |
| 5. Optimized Geometries.....                                 | S19-S50 |

## 1. Experimental Procedures

**General Procedures and Materials.** All reactions were carried out under a dry and oxygen-free nitrogen atmosphere in a Vigor (SG1200/750TS-F) glovebox. Anhydrous THF, toluene, and hexane were purified using an MB SPS-800 Solvent Purification System and dried over fresh Na chips in glovebox.  $C_6D_6$ ,  $CDCl_3$ , and  $d_8$ -THF were purchased from J&K and transferred under vacuum, dried over Na/K alloy, and stored in the glovebox. Organometallic samples for NMR spectroscopic measurements were prepared in the glovebox using J-Young valve NMR tubes.  $^1H$ ,  $^{13}C$  and  $^{13}C$ - $^1H$  HSQC spectra were recorded on a Bruker Advance 400 MHz spectrometer. All chemical shifts were reported in  $\delta$  units with reference to the residual solvent resonance of the deuterated solvents for proton and chemical shifts. High-resolution mass spectra (HRMS) were obtained on a micro TOF II instrument using ESI ionization sources. Elemental analyses for C, H, and N were carried out on a vario EL III elemental analyzer. Organic molecules were identified and quantified by gas chromatography (Shimadzu 2010 Plus, 0.25 mm  $\times$  30 m Rtx-5 capillary column), and then detected by an Agilent Technologies 7890A gas chromatograph and an Agilent Technologies 5975C mass spectrometer. Anhydrous  $YCl_3$  were prepared according to literature procedures. **1** was prepared according to our previous report<sup>2</sup>.  $PhSiH_3$ , 4-methylphenyl isothiocyanate, phenyl isothiocyanate, tert-butyl isocyanide,  $S_8$ , and KCl were purchased from J&K and dried with a vacuum drying oven. Liquid reagents were additionally dried with 4 Å sieves. Other commercially available reagents were purchased and used without further purification.

### Preparation Details for Complexes 2-9

**Synthesis of 2-4.** Complex **1** (0.723 g, 1.0 mmol) and KCl (0.037g, 0.5 mmol) were placed in a Schlenk reaction flask with a Teflon-sealed stopcock, and 10 mL of THF solution was added to dissolve. After stirred for 24 h at 60 °C, a THF solution of  $S_8$  (0.064g, 0.25 mmol) was added dropwise and stirred for 12 h. The resulting pale-yellow turbid solution was filtered, and the filtrate was collected and concentrated to dryness under vacuum. Then, 10 mL of n-hexane was added, stirred, and dried by suction. This operation was repeated three times, and the final n-hexane mixture was filtered through a sintered glass funnel to obtain a pale-yellow solid powder. The solid powder was redissolved in a toluene solution, and the insoluble material was filtered off. The clear filtrate was concentrated to saturation and left to stand at room temperature for several days, yielding colorless transparent block-shaped crystals **2**, which is suitable for X-ray single-crystal diffraction analysis. Crude samples of **3** were collected from the insoluble material after the pale yellow solid powder redissolved in a toluene solution. and were redissolved in a THF solution, concentrated to saturation, and left to stand at room temperature for several days, could yield colorless transparent plate-shaped crystals **3**, which is suitable for X-ray single-crystal diffraction analysis. The crystals of **4** could obtained from mother liquid of **2** by n-hexane diffusion.

For **2**, Yield: 0.103 g (23% based on Y metal).  $^1H$  NMR (400 MHz,  $d_8$ -THF, 25 °C):  $\delta$  [ppm] 1.77 (br s, 4H, THF), 2.38 (s, 36H,  $CH_3$ -Tp<sup>Me2</sup>), 2.51 (s, 18H,  $CH_3$ -Tp<sup>Me2</sup>), 3.61 (br s, 4H, THF), 5.68 (overlap s, 2H, CH-Tp<sup>Me2</sup>), 5.70 (overlap s, 5H, CH-Tp<sup>Me2</sup>), 5.76 (br s, 2H, CH-Tp<sup>Me2</sup>), 7.07–7.13 (m, 5H, H-Ar), 7.17 (d,  $J$  = 7.2 Hz, 3H, H-Ar), 8.05 (d,  $J$  = 7.6 Hz, 2H, H-Ar).  $^{13}C$  NMR (100 MHz,  $d_8$ -THF, 25 °C):  $\delta$  [ppm] 11.9 ( $CH_3$ -Tp<sup>Me2</sup>), 12.1 ( $CH_3$ -Tp<sup>Me2</sup>), 15.2 ( $CH_3$ -Tp<sup>Me2</sup>), 29.6 (THF), 66.9 (THF), 105.4 (CH-Tp<sup>Me2</sup>), 105.6 (CH-Tp<sup>Me2</sup>), 105.6 (CH-Tp<sup>Me2</sup>), 125.0 (C-Ar), 125.8 (C-Ar), 126.1 (C-Ar), 126.8 (C-Ar), 127.8 (C-Ar), 128.6 (C-Ar), 130.7 (C-Ar), 133.7 (C-Ar), 144.5 (C-Tp<sup>Me2</sup>), 150.3 (C-Tp<sup>Me2</sup>). Anal. Calcd for  $C_{61}H_{84}B_3ClN_{18}OS_8Si_2Y_4$  (1820.06): C, 40.22; H, 4.65; N, 13.84. Found: C, 40.35; H, 4.46; N, 14.01.

For **3**, Yield: 0.311 g (47% based on Y metal).  $^1H$  NMR (400 MHz,  $d_8$ -THF, 25 °C):  $\delta$  [ppm] 1.69 (br s, 8H, THF), 1.79 (s, 18H,  $CH_3$ -Tp<sup>Me2</sup>), 2.24 (d,  $J$  = 6.0 Hz, 18H,  $CH_3$ -Tp<sup>Me2</sup>), 2.33 (s, 18H,  $CH_3$ -Tp<sup>Me2</sup>), 2.49 (s, 18H,  $CH_3$ -Tp<sup>Me2</sup>), 2.77 (s, 18H,  $CH_3$ -Tp<sup>Me2</sup>), 3.55 (br s, 8H, THF), 5.37 (s, 6H, CH-Tp<sup>Me2</sup>), 5.40 (s, 3H, CH-Tp<sup>Me2</sup>), 5.96 (s, 6H, CH-Tp<sup>Me2</sup>), 6.49 (t,  $J$  = 7.6 Hz, 6H, H-Ar), 6.49 (t,  $J$  = 7.6 Hz, 3H, H-Ar), 7.32 (d,  $J$  = 6.8 Hz, 6H, H-Ar).  $^{13}C$  NMR (100 MHz,  $d_8$ -THF, 25 °C):  $\delta$  [ppm] 11.6 ( $CH_3$ -Tp<sup>Me2</sup>), 12.0 ( $CH_3$ -Tp<sup>Me2</sup>), 12.2 ( $CH_3$ -Tp<sup>Me2</sup>), 14.9 ( $CH_3$ -Tp<sup>Me2</sup>), 15.1 ( $CH_3$ -Tp<sup>Me2</sup>), 24.8 (THF), 66.9 (THF), 104.4 (CH-Tp<sup>Me2</sup>), 104.9 (CH-Tp<sup>Me2</sup>), 106.4 (CH-Tp<sup>Me2</sup>), 124.4 (C-Ar), 124.8 (C-Ar), 133.4 (C-Ar), 133.5 (C-Ar), 142.8 (C-Tp<sup>Me2</sup>), 143.1 (C-Tp<sup>Me2</sup>), 147.6 (C-Tp<sup>Me2</sup>), 148.8 (C-Tp<sup>Me2</sup>), 150.4 (C-Tp<sup>Me2</sup>), 150.5 (C-Tp<sup>Me2</sup>), 150.6 (C-Tp<sup>Me2</sup>). Anal. Calcd for  $C_{101}H_{141}B_5K_2N_{30}O_2S_9Si_3Y_4$  (2668.12): C, 47.47; H, 5.33; N, 15.75. Found: C, 47.28; H, 5.44; N, 15.63.

For **4**, Yield: 0.072 g (11% based on Y metal). No valuable NMR spectra data were obtained due to its poor solubility in  $d_8$ -THF. Anal. Calcd for  $C_{72}H_{124}B_4Cl_4KN_{26}Si_4Y_3$  (1957.19): C, 44.19; H, 6.39; N, 18.61. Found: C, 44.28; H, 6.45; N, 18.47.

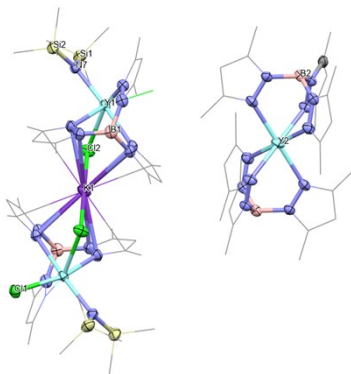

**Figure S1.** Molecular structure of **4** with ellipsoids set at 30% probability. All hydrogen atoms are omitted for clarity. Selected bond lengths [Å] and angles (°): Y1–Cl1 2.590(7), Y1–Cl2 2.654(7), Y1–N7 2.276(2), K1–Cl2 3.112(7); Cl1–Y1–Cl2 104.2(2), N7–Y1–Cl1 101.2(6), Cl2–K1–Cl2A 180.

**Synthesis of 5 and 6.** At room temperature, the complex **1** (0.723 g, 1.0 mmol) was placed in a Schlenk reaction flask with a Teflon-sealed stopcock, and 5 mL of THF solution was added to dissolve. Subsequently, a THF solution of S<sub>8</sub> (0.032g, 0.125 mmol) was added dropwise, and the reaction flask was placed in a 60 °C oil bath and heated for 12 h. The resulting pale-yellow solution was concentrated to dryness under vacuum and washed (15 ml × 2) with hexane to give the pale-yellow powder **5**. Colorless single crystals suitable for X-ray diffraction analysis were obtained by a slow solvent evaporation method from a toluene (1 mL) solution of **5**. Yield: 0.503 g (88%). <sup>1</sup>H NMR (400 MHz, C<sub>6</sub>D<sub>6</sub>, 25 °C): δ [ppm] : δ 8.12 (d, J = 7.2 Hz, 2H, *H*-Ar), 7.24 (d, J = 6.5 Hz, 3H, *H*-Ar), 5.57 (s, 1H, *CH*-Tp<sup>Me2</sup>), 5.52 (s, 1H, *CH*-Tp<sup>Me2</sup>), 5.46 (s, 1H, *CH*-Tp<sup>Me2</sup>), 5.30 (s, 1H, SiH), 5.18 (s, 1H, SiH), 3.63 (s, 4H, THF), 2.69 (s, 3H, CH<sub>3</sub>-Tp<sup>Me2</sup>), 2.40 (s, 6H, CH<sub>3</sub>-Tp<sup>Me2</sup>), 2.09 (s, 10H, CH<sub>3</sub>-Tp<sup>Me2</sup> & SCH), 1.23 (s, 4H, THF), 0.82 (s, 3H, SiCH<sub>3</sub>), 0.56 (s, 3H, SiCH<sub>3</sub>), 0.10 (s, 9H, Si(CH<sub>3</sub>)<sub>3</sub>). <sup>13</sup>C NMR (100 MHz, C<sub>6</sub>D<sub>6</sub>, 25 °C): δ [ppm]: δ 150.9 (C-Tp<sup>Me2</sup>), 149.9 (C-Tp<sup>Me2</sup>), 146.0 (C-Tp<sup>Me2</sup>), 145.7 (C-Tp<sup>Me2</sup>), 144.8 (C-Tp<sup>Me2</sup>), 136.6 (C-Ar), 129.3 (C-Ar), 106.7 – 106.0 (CH-Tp<sup>Me2</sup>), 70.7 (THF), 25.3 (THF), 15.2 (CH<sub>3</sub>-Tp<sup>Me2</sup>), 13.0 (CH<sub>3</sub>-Tp<sup>Me2</sup>), 6.2 (SCH), 5.6 (Si(CH<sub>3</sub>)<sub>3</sub>). Anal. Calcd for C<sub>31</sub>H<sub>53</sub>BN<sub>7</sub>OSSi<sub>3</sub>Y (755.85): C, 49.26; H, 7.07; N, 12.97. Found: C, 49.16; H, 7.10; N, 12.93.

Additionally, complex **5** could further convert into known yttrium disulfide **6** (0.259 g, 57%) and unidentified organic products by reacting with S<sub>8</sub> (0.032g, 0.125 mmol) after heating for 12 h. Complex **6** could be also obtained by the reaction of **1** (0.723 g, 1.0 mmol) and S<sub>8</sub> (0.064 g, 0.25 mmol) directly after heating for 12 h. The crystal structure of **6** has also been confirmed by XRD analysis.

**Synthesis of 7.** Complex **1** (0.723 g, 1.0 mmol) and KCl (0.037 g, 0.5 mmol) were placed in a Schlenk reaction flask with a Teflon-sealed stopper. 10 mL of THF solution was added to dissolve the reactants. After stirred for 24 h at 60 °C, a THF solution of 4-methylphenyl isothiocyanate (0.149 g, 1.0 mmol) was added dropwise and stirred for 5 h. The resulting pale-yellow transparent solution was concentrated under reduced pressure to dryness. 10 mL of hexane was added and the mixture was stirred and dried. This operation was repeated three times, and the final hexane mixture was filtered through a sintered glass funnel to obtain a pale-yellow solid powder **7**. The solid powder was then redissolved in toluene, concentrated to saturation, and left to stand at room temperature for several days, yielding pale yellow transparent block-shaped crystals **7**, which is suitable for X-ray single-crystal diffraction analysis. Yield: 0.531 g (78%). <sup>1</sup>H NMR (400 MHz, C<sub>6</sub>D<sub>6</sub>, 25 °C): δ [ppm] –0.05 (s, 9H, –Si(CH<sub>3</sub>)<sub>3</sub>), 1.26 (s, 3H, –Si(CH<sub>3</sub>)<sub>2</sub>–), 1.30 (s, 3H, –Si(CH<sub>3</sub>)<sub>2</sub>–), 1.87 (s, 3H, CH<sub>3</sub>Ph–), 1.89 (s, 3H, CH<sub>3</sub>Ph–), 1.93 (s, 3H, CH<sub>3</sub>-Tp<sup>Me2</sup>), 2.01 (s, 3H, CH<sub>3</sub>-Tp<sup>Me2</sup>), 2.03 (s, 3H, CH<sub>3</sub>-Tp<sup>Me2</sup>), 2.09 (overlap s, 9H, CH<sub>3</sub>-Tp<sup>Me2</sup>), 2.10 (overlap s, 3H, CH<sub>3</sub>-Tp<sup>Me2</sup>), 2.47 (s, 3H, CH<sub>3</sub>-Tp<sup>Me2</sup>), 2.53 (s, 3H, CH<sub>3</sub>-Tp<sup>Me2</sup>), 2.83 (s, 3H, CH<sub>3</sub>-Tp<sup>Me2</sup>), 3.01 (s, 3H, CH<sub>3</sub>-Tp<sup>Me2</sup>), 4.73 (br s, 2H, BH-Tp<sup>Me2</sup>), 5.28 (s, 1H, CH-Tp<sup>Me2</sup>), 5.38 (overlap s, 1H, CH-Tp<sup>Me2</sup>), 5.39 (overlap s, 1H, CH-Tp<sup>Me2</sup>), 5.48 (s, 1H, CH-Tp<sup>Me2</sup>), 5.50 (s, 1H, CH-Tp<sup>Me2</sup>), 5.54 (s, 1H, CH-Tp<sup>Me2</sup>), 6.56 (s, 1H, –(CH<sub>3</sub>)<sub>2</sub>SiCHC–), 6.66 (d, J = 7.6 Hz, 2H, *H*-Ar), 6.71 (d, J = 7.6 Hz, 2H, *H*-Ar), 7.26 (d, J = 7.6 Hz, 2H, *H*-Ar), 7.50 (d, J = 7.6 Hz, 2H, *H*-Ar). <sup>13</sup>C NMR (100 MHz, C<sub>6</sub>D<sub>6</sub>, 25 °C): δ [ppm] 2.3 (–Si(CH<sub>3</sub>)<sub>2</sub>–), 3.6 (–Si(CH<sub>3</sub>)<sub>2</sub>–), 4.5 (–Si(CH<sub>3</sub>)<sub>3</sub>), 12.4 (CH<sub>3</sub>-Tp<sup>Me2</sup>), 12.5 (CH<sub>3</sub>-Tp<sup>Me2</sup>), 12.6 (CH<sub>3</sub>-Tp<sup>Me2</sup>), 12.6 (CH<sub>3</sub>-Tp<sup>Me2</sup>), 12.7 (CH<sub>3</sub>-Tp<sup>Me2</sup>), 12.8 (CH<sub>3</sub>-Tp<sup>Me2</sup>), 13.1 (CH<sub>3</sub>-Tp<sup>Me2</sup>), 13.6 (CH<sub>3</sub>-Tp<sup>Me2</sup>), 15.0 (CH<sub>3</sub>-Tp<sup>Me2</sup>), 15.4 (CH<sub>3</sub>-Tp<sup>Me2</sup>), 16.2 (CH<sub>3</sub>-Tp<sup>Me2</sup>), 16.6 (CH<sub>3</sub>-Tp<sup>Me2</sup>), 20.3 (CH<sub>3</sub>Ph–), 20.4 (CH<sub>3</sub>Ph–), 73.7 (–(CH<sub>3</sub>)<sub>2</sub>SiCHC–), 105.6 (CH-Tp<sup>Me2</sup>), 105.7 (CH-Tp<sup>Me2</sup>), 106.0 (CH-Tp<sup>Me2</sup>), 106.2 (CH-Tp<sup>Me2</sup>), 106.3 (CH-Tp<sup>Me2</sup>), 123.2 (C-Ar), 123.8 (C-Ar), 129.0 (C-Ar), 129.4 (C-Ar), 133.9 (C-Ar), 134.1 (C-Ar), 144.4 (C-Ar), 145.1 (–N=CS), 145.1 (–N=CS), 145.2 (C-Ar), 145.4 (C-Tp<sup>Me2</sup>), 146.1 (C-Tp<sup>Me2</sup>), 146.2 (C-Tp<sup>Me2</sup>), 146.9 (C-Tp<sup>Me2</sup>), 150.4 (C-Tp<sup>Me2</sup>), 150.7 (C-Tp<sup>Me2</sup>), 151.0 (C-Tp<sup>Me2</sup>), 151.0 (C-Tp<sup>Me2</sup>), 151.5 (C-Tp<sup>Me2</sup>), 151.8 (C-Tp<sup>Me2</sup>), 194.7 (C-Tp<sup>Me2</sup>), 196.4 (C-Tp<sup>Me2</sup>). Anal. Calcd for C<sub>59</sub>H<sub>82</sub>B<sub>2</sub>ClN<sub>15</sub>S<sub>2</sub>Si<sub>2</sub>Y<sub>2</sub> (1355.38): C, 52.24; H, 6.09; N, 15.49. Found: C, 52.11; H, 5.98; N, 15.72.

Hydrolyzing the hexane solution of reaction concentration, we detected the hydrolysis product by GC-MS analysis, mainly as the silylamine organic compound [(PhSiH<sub>2</sub>)<sub>2</sub>CHSi(Me)<sub>2</sub>]NHSiMe<sub>3</sub> (**II**), which is the hydrolysis product of KNSiMe<sub>3</sub>Si(Me)<sub>2</sub>CH(SiH<sub>2</sub>Ph)<sub>2</sub> (**I**). The **II** was further purified by vacuum distillation at 150 °C to obtain a pure, colorless, oily liquid. <sup>1</sup>H NMR (400 MHz, CDCl<sub>3</sub>, 25 °C): δ [ppm] -0.09 (br s, 1H, (-SiH<sub>2</sub>)<sub>2</sub>CHSi(CH<sub>3</sub>)<sub>2</sub>-), -0.01 (s, 9H, -Si(CH<sub>3</sub>)<sub>3</sub>), 0.14 (s, 6H, -Si(CH<sub>3</sub>)<sub>2</sub>-), 4.46-4.48 (m, 2H, -SiH<sub>2</sub>-), 4.52 (m, 2H, -SiH<sub>2</sub>-), 7.30-7.33 (m, 4H, *H*-Ar), 7.37 (d, *J* = 6.8 Hz, 2H, *H*-Ar), 7.53 (d, *J* = 7.2 Hz, 4H, *H*-Ar). <sup>13</sup>C NMR (100 MHz, CDCl<sub>3</sub>, 25 °C): δ [ppm] -5.2 (-SiH<sub>2</sub>)<sub>2</sub>CHSi(CH<sub>3</sub>)<sub>2</sub>-, 2.4 (-Si(CH<sub>3</sub>)<sub>3</sub>), 2.5 (-Si(CH<sub>3</sub>)<sub>2</sub>-), 127.9 (*C*-Ar), 129.6 (*C*-Ar), 133.5 (*C*-Ar), 135.3 (*C*-Ar). HRMS Calcd for C<sub>18</sub>H<sub>32</sub>NSi<sub>4</sub> [M+H]<sup>+</sup>: 374.1612; Found: 374.1621.

**Synthesis of 8.** Complex **1** (0.723 g, 1.0 mmol) was placed in a Schlenk reaction flask with a Teflon-sealed stopcock, and 5 mL of THF solution was added to dissolve. Subsequently, a THF solution of phenyl isothiocyanate (0.135 g, 1 mmol) was added dropwise, and the reaction flask was placed in a 60 °C oil bath and heated for 12 h. The resulting pale-yellow solution was concentrated to dryness under vacuum and washed (15 ml × 2) with hexane to give the pale-yellow powder **8**. Colorless single crystals suitable for X-ray diffraction analysis were obtained by a slow solvent evaporation method from a toluene (1 mL) solution of **8**. Yield: 0.738 g (86%). <sup>1</sup>H NMR (400 MHz, C<sub>6</sub>D<sub>6</sub>, 25 °C): δ [ppm] : δ 7.36 (s, 1H, *H*-Ar), 7.12 (s, 2H, *H*-Ar), 7.02 (s, 6H, *H*-Ar), 6.96 (s, 1H, *H*-Ar), 5.64 (s, 1H, *CH*-Tp<sup>Me2</sup>), 5.57 (s, 1H, *SiH*), 5.53 (s, 2H, *CH*-Tp<sup>Me2</sup>), 5.43 (s, 1H, *SiH*), 2.56 (s, 4H, *THF*), 2.20 (s, 3H, CH<sub>3</sub>-Tp<sup>Me2</sup>), 2.18 (s, 6H, CH<sub>3</sub>-Tp<sup>Me2</sup>), 2.11 (s, 6H, CH<sub>3</sub>-Tp<sup>Me2</sup>), 2.09 (s, 2H, CH<sub>3</sub>-Tp<sup>Me2</sup>), 1.97 (s, 4H, CH<sub>3</sub>-Tp<sup>Me2</sup>), 1.53 (s, 1H, *CCH*), 1.38 (s, 4H, *THF*), 0.71 (s, 6H, SiCH<sub>3</sub>), 0.54 & 0.10 (s, 3H, Si(CH<sub>3</sub>)<sub>3</sub>), -0.18 (s, 6H, Si(CH<sub>3</sub>)<sub>3</sub>). <sup>13</sup>C NMR (100 MHz, C<sub>6</sub>D<sub>6</sub>, 25 °C): δ [ppm]: δ 150.5 (*C*-Tp<sup>Me2</sup>), 149.9 (*C*-Tp<sup>Me2</sup>), 149.8 (*C*-Tp<sup>Me2</sup>), 146.1 (*C*-Tp<sup>Me2</sup>), 144.5 (*C*-Tp<sup>Me2</sup>), 129.4 (*C*-Ar), 106.5-106.1 (*CH*-Tp<sup>Me2</sup>), 14.7 (CH<sub>3</sub>-Tp<sup>Me2</sup>), 13.1 (CH<sub>3</sub>-Tp<sup>Me2</sup>), 12.0 (CH<sub>3</sub>-Tp<sup>Me2</sup>), 11.8 (CH<sub>3</sub>-Tp<sup>Me2</sup>), 9.2 (SCH), 6.6 (Si(CH<sub>3</sub>)<sub>3</sub>). Anal. Calcd for C<sub>38</sub>H<sub>58</sub>BN<sub>8</sub>OSSi<sub>3</sub>Y (858.97): C, 53.13; H, 6.81; N, 13.04. Found: C, 52.98; H, 6.79; N, 13.00.

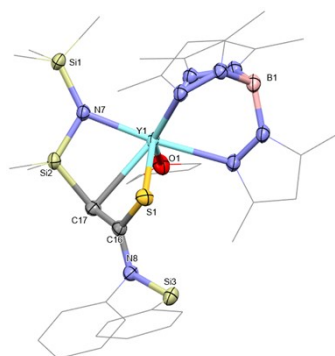

**Figure S2.** Molecular structure of **8** with ellipsoids set at 30% probability. All hydrogen atoms are omitted for clarity. Selected bond lengths [Å] and angles (°): Y1-N7 2.2579(17), Y1-Si1, 2.7620(6) Y1-C17 2.732(2), Y1-C16 2.976(2), C17-C16 1.374(3), C16-S1 1.736(2), C16-N8 1.396(3); Y1-Si1-C16 79.27(7), C17-C16-N8 123.7(2).

**Synthesis of 9.** In the glove box, complex **1** (0.723 g, 1.0 mmol) was placed in a Schlenk reaction flask with a Teflon-sealed stopper, and 10 mL of THF solution was added to dissolve it. Then, a THF solution of tert-butyl isocyanide (0.04 g, 0.5 mmol) was added dropwise. The reaction flask was sealed and removed, and CO<sub>2</sub> (1.12 mL, 0.5 mmol) was bubbled through the solution. The reaction flask was then placed in a 60 °C oil bath and heated for 12 h. The resulting pale yellow, clear solution was concentrated under vacuum to dryness. Then, 10 mL of hexane was added, and the mixture was stirred and dried. This operation was repeated three times, and the final hexane mixture was filtered through a sintered glass funnel to obtain a pale yellow solid powder **9**. The solid powder was redissolved in toluene, concentrated to saturation, and left to stand at room temperature for several days, yielding colorless block-shaped crystals **9**, which is suitable for X-ray single-crystal diffraction analysis. Yield: 0.252 g (35%). <sup>1</sup>H NMR (400 MHz, C<sub>6</sub>D<sub>6</sub>, 25 °C): δ [ppm] -0.82 (s, 3H, -Si(CH<sub>3</sub>)<sub>2</sub>-), -0.22 (s, 9H, -Si(CH<sub>3</sub>)<sub>3</sub>), 0.07 (s, 3H, -Si(CH<sub>3</sub>)<sub>2</sub>-), 0.18 (s, 9H, -Si(CH<sub>3</sub>)<sub>3</sub>), 0.68 (s, 3H, -Si(CH<sub>3</sub>)<sub>2</sub>-), 0.90 (s, 9H, CH<sub>3</sub>-<sup>t</sup>Bu), 0.98 (s, 3H, -Si(CH<sub>3</sub>)<sub>2</sub>-), 1.95 (s, 3H, CH<sub>3</sub>-Tp<sup>Me2</sup>), 2.05 (s, 3H, CH<sub>3</sub>-Tp<sup>Me2</sup>), 2.10 (s, 3H, CH<sub>3</sub>-Tp<sup>Me2</sup>), 2.18 (s, 3H, CH<sub>3</sub>-Tp<sup>Me2</sup>), 2.23 (s, 3H, CH<sub>3</sub>-Tp<sup>Me2</sup>), 2.26 (s, 3H, CH<sub>3</sub>-Tp<sup>Me2</sup>), 2.38 (s, 3H, CH<sub>3</sub>-Tp<sup>Me2</sup>), 2.48 (s, 3H, CH<sub>3</sub>-Tp<sup>Me2</sup>), 2.64 (s, 3H, CH<sub>3</sub>-Tp<sup>Me2</sup>), 2.77 (s, 3H, CH<sub>3</sub>-Tp<sup>Me2</sup>), 2.90 (s, 3H, CH<sub>3</sub>-Tp<sup>Me2</sup>), 2.92 (s, 3H, CH<sub>3</sub>-Tp<sup>Me2</sup>), 3.90 (d, *J* = 7.6 Hz, 1H, -Si(CH<sub>3</sub>)<sub>2</sub>CH-), 5.18 (d, *J* = 6.0 Hz, 1H, PhSiH<sub>2</sub>-), 5.25 (d, *J* = 5.6 Hz, 1H, PhSiH<sub>2</sub>-), 5.36 (s, 1H, *CH*-Tp<sup>Me2</sup>), 5.58 (s, 2H, *CH*-Tp<sup>Me2</sup>), 5.60 (s, 1H, *CH*-Tp<sup>Me2</sup>), 5.64 (s, 1H, *CH*-Tp<sup>Me2</sup>), 5.68 (s, 1H, *CH*-Tp<sup>Me2</sup>), 5.77 (s, 1H, PhSiH<sub>2</sub>-), 5.89 (s, 1H, PhSiH<sub>2</sub>-), 7.13 (d, *J* = 2.4 Hz, 2H, *H*-Ar), 7.30 (d, *J* = 7.2 Hz, 1H, *H*-Ar), 7.35-7.40 (m, 3H, *H*-Ar), 7.75-7.77 (m, 2H, *H*-Ar), 8.12 (d, *J* = 6.4 Hz, 2H, *H*-Ar), 8.52 (d, *J* = 7.2 Hz, 1H, <sup>t</sup>BuN=CH-). <sup>13</sup>C NMR (100 MHz, C<sub>6</sub>D<sub>6</sub>, 25 °C): δ [ppm] -0.3 (-Si(CH<sub>3</sub>)<sub>2</sub>-), 3.4 (-Si(CH<sub>3</sub>)<sub>2</sub>-), 5.0 (-Si(CH<sub>3</sub>)<sub>3</sub>), 5.3

(-Si(CH<sub>3</sub>)<sub>3</sub>), 8.5 (-Si(CH<sub>3</sub>)<sub>2</sub>-), 8.8 (-Si(CH<sub>3</sub>)<sub>2</sub>-), 12.6 (CH<sub>3</sub>-Tp<sup>Me2</sup>), 12.7 (CH<sub>3</sub>-Tp<sup>Me2</sup>), 12.9 (CH<sub>3</sub>-Tp<sup>Me2</sup>), 12.9 (CH<sub>3</sub>-Tp<sup>Me2</sup>), 13.0 (CH<sub>3</sub>-Tp<sup>Me2</sup>), 14.0 (CH<sub>3</sub>-Tp<sup>Me2</sup>), 15.2 (CH<sub>3</sub>-Tp<sup>Me2</sup>), 15.9 (CH<sub>3</sub>-Tp<sup>Me2</sup>), 16.2 (CH<sub>3</sub>-Tp<sup>Me2</sup>), 16.3 (CH<sub>3</sub>-Tp<sup>Me2</sup>), 16.6 (CH<sub>3</sub>-Tp<sup>Me2</sup>), 17.2 (CH<sub>3</sub>-Tp<sup>Me2</sup>), 29.5 (CH<sub>3</sub>-<sup>t</sup>Bu), 30.5 (CH<sub>3</sub>-<sup>t</sup>Bu), 32.0 (CH<sub>3</sub>-<sup>t</sup>Bu), 58.2 (CH-<sup>t</sup>Bu), 59.1 (-Si(CH<sub>3</sub>)<sub>2</sub>CH-), 105.4 (CH-Tp<sup>Me2</sup>), 105.5 (CH-Tp<sup>Me2</sup>), 105.7 (CH-Tp<sup>Me2</sup>), 105.9 (CH-Tp<sup>Me2</sup>), 105.9 (CH-Tp<sup>Me2</sup>), 106.2 (CH-Tp<sup>Me2</sup>), 121.5 (C-Ar), 121.8 (C-Ar), 125.1 (C-Ar), 126.2 (C-Ar), 127.2 (C-Ar), 127.7 (C-Ar), 128.4 (C-Ar), 135.1 (C-Ar), 136.0 (C-Ar), 138.2 (C-Ar), 143.8 (C-Tp<sup>Me2</sup>), 143.9 (C-Tp<sup>Me2</sup>), 144.4 (C-Tp<sup>Me2</sup>), 145.3 (C-Tp<sup>Me2</sup>), 145.6 (C-Tp<sup>Me2</sup>), 146.0 (C-Tp<sup>Me2</sup>), 146.7 (C-Tp<sup>Me2</sup>), 148.8 (C-Tp<sup>Me2</sup>), 149.3 (C-Tp<sup>Me2</sup>), 150.2 (C-Tp<sup>Me2</sup>), 150.4 (C-Tp<sup>Me2</sup>), 151.2 (C-Tp<sup>Me2</sup>), 151.3 (C-Tp<sup>Me2</sup>), 174.3 (<sup>t</sup>BuN=CH-), 175.7 (-CO<sub>2</sub>). Anal. Calcd for C<sub>60</sub>H<sub>99</sub>B<sub>2</sub>N<sub>15</sub>O<sub>2</sub>Si<sub>6</sub>Y<sub>2</sub> (1430.47): C, 50.38; H, 6.98; N, 14.69. Found: C, 50.72; H, 6.79; N, 14.81.

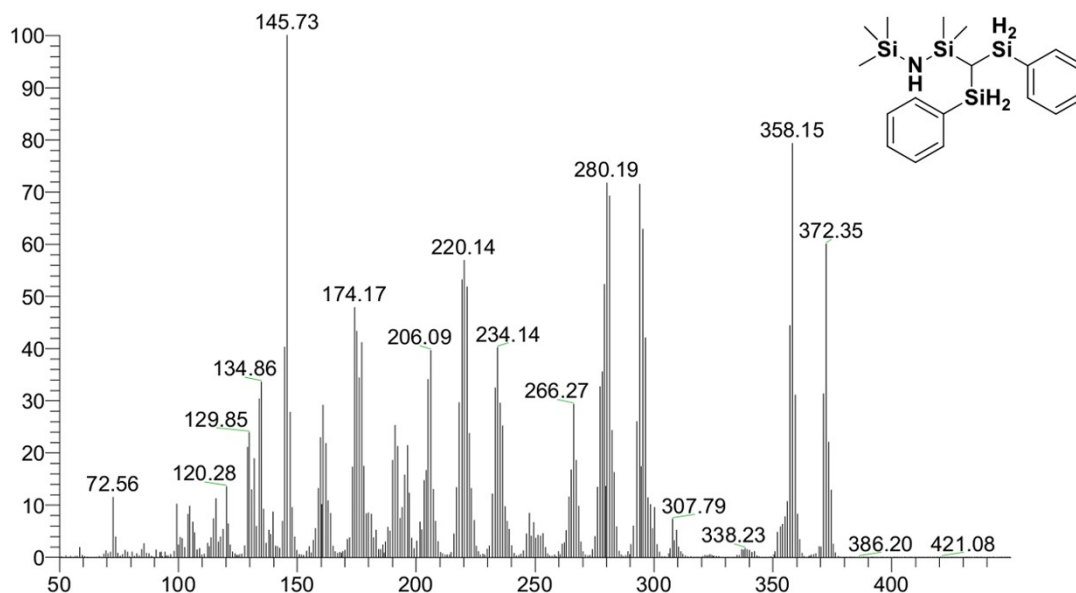

**Figure S3.** GC-MS detected hydrolysis product HNSiMe<sub>3</sub>Si(Me<sub>2</sub>)CH(SiH<sub>2</sub>Ph)<sub>2</sub> (II).

**X-ray Data Collection, Structure Determination, and Refinement.** Data collections were performed on Bruker D8 VENTURE system diffractometers (173 K, Ga K $\alpha$  radiation,  $\omega$ -scan technique,  $\lambda = 1.34138$  Å). Diffraction data were collected over the full sphere and corrected for absorption. Structure solutions were found with SHELXS<sup>3</sup> package using direct methods and were refined with SHELXTL program<sup>4</sup> against  $F^2$  using first isotropic and late anisotropic thermal parameters for all non-hydrogen atoms. Hydrogen atoms were placed at calculated positions and included in the structure calculation without further refinement of the parameters. The residual electron densities were of no chemical significance. Details of SQUEEZE are given in the cif files..

## 2. Computational Details

The optimizations of reactant, intermediates, transition states, IRC, and product were carried out by employing DFT hybrid functional (B3PW91)<sup>5</sup> along with small core pseudopotential Stuttgart basis set<sup>6</sup> for yttrium, potassium atoms, and Pople basis set<sup>7</sup> (6-31G\*\*) for the rest of atoms. Frequency calculations were performed to locate saddle points for transition state structures, minima for the rest of the structures, and for obtaining thermal corrections over the energies. Dispersion corrections were included in our calculations by employing the D3 version of Grimme's dispersion with Becke-Johnson damping<sup>8</sup>. Solvent corrections using the SMD model<sup>9</sup> were included by considering the reaction in toluene. All the calculations were performed using the Gaussian 16 package<sup>10</sup>.

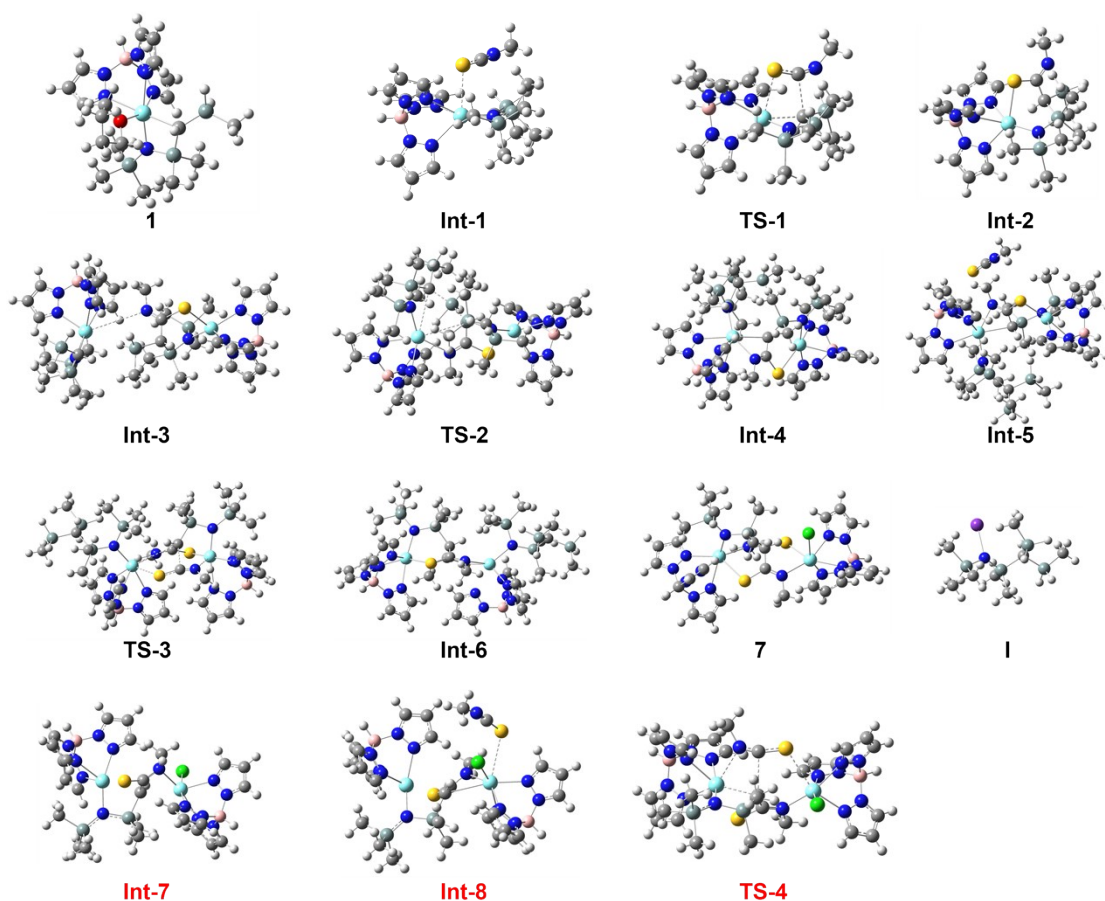

**Figure S4.** The optimized atomic structures of reactant, intermediates, transition states, and product. For clarity, Me in  $\text{Tp}^{\text{Me}_2}$  and Ph in total molecules were simplified in H and  $\text{CH}_3$ , respectively.

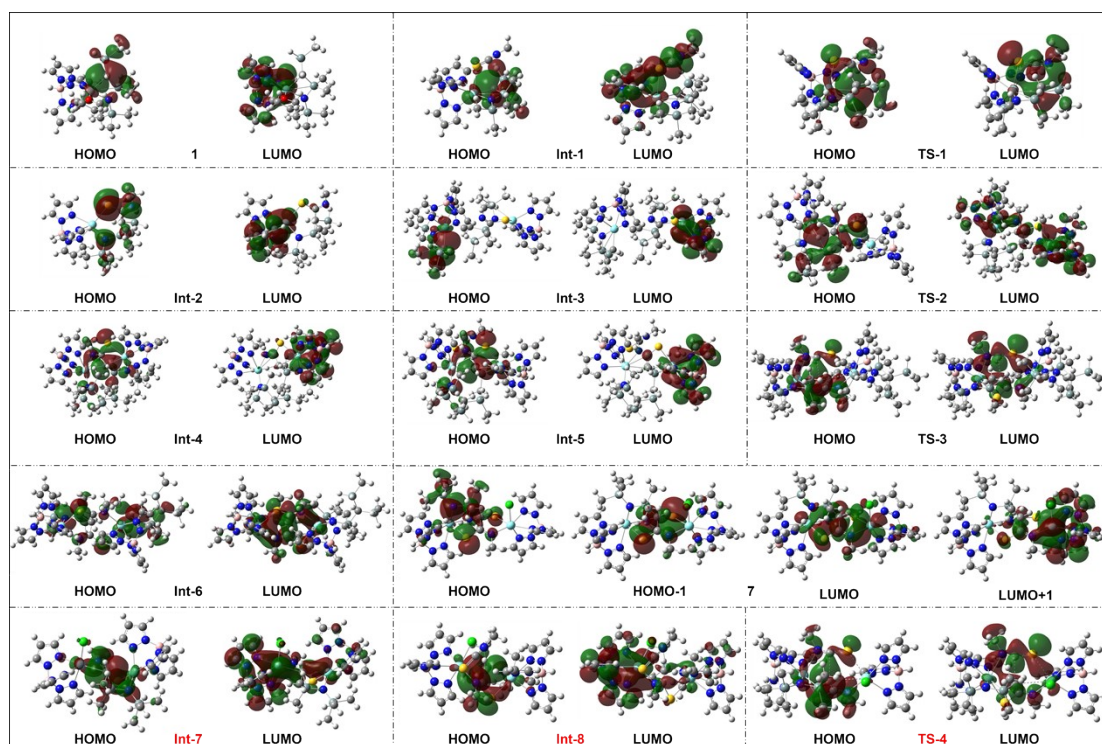

**Figure S5.** Molecular orbitals for reactant, intermediates, transition states, and product (isovalue = 0.02). For clarity, Me in  $\text{Tp}^{\text{Me}_2}$  and Ph in total molecules were simplified in H and  $\text{CH}_3$ , respectively.

### 3. X-ray Crystallographic Analysis of All new Complexes

**Table S1.** Crystal data and structure refinement for **2**, **3** and **4**

|                                                   | <b>2</b>                                    | <b>3</b>                                    | <b>4</b>                                    |
|---------------------------------------------------|---------------------------------------------|---------------------------------------------|---------------------------------------------|
| Formula                                           | $C_{61}H_{84}B_3ClN_{18}OS_8Si_2Y_4$        | $C_{101}H_{141}B_5K_2N_{30}O_2S_9Si_3Y_4$   | $C_{72}H_{124}B_4Cl_4KN_{26}Si_4Y_3$        |
| Formula weight                                    | 1821.64                                     | 2668.13                                     | 1957.19                                     |
| Temperature (K)                                   | 173(2)                                      | 173(2)                                      | 173(2)                                      |
| Wavelength                                        | 1.34138                                     | 1.34138                                     | 1.34138                                     |
| Crystal system                                    | Triclinic                                   | Triclinic                                   | Triclinic                                   |
| Space group                                       | <i>P</i> -1                                 | <i>P</i> -1                                 | <i>P</i> -1                                 |
| a(Å)                                              | 13.1824(8)                                  | 14.1551(10)                                 | 12.1010(12)                                 |
| b(Å)                                              | 19.7505(13)                                 | 19.7674(14)                                 | 14.5774(14)                                 |
| c(Å)                                              | 20.5607(13)                                 | 32.281(2)                                   | 16.2856(17)                                 |
| α(deg)                                            | 94.847(3)                                   | 73.351(2)                                   | 97.075(3)                                   |
| β(deg)                                            | 97.001(2)                                   | 89.229(2)                                   | 106.057(3)                                  |
| γ(deg)                                            | 104.799(2)                                  | 71.840(2)                                   | 93.058(4)                                   |
| V(Å <sup>3</sup> )                                | 5099.6(6)                                   | 8194.1(10)                                  | 2728.2(5)                                   |
| Z                                                 | 2                                           | 2                                           | 1                                           |
| D <sub>c</sub> (g/m <sup>3</sup> )                | 1.186                                       | 1.081                                       | 1.191                                       |
| μ (mm <sup>-1</sup> )                             | 3.513                                       | 2.597                                       | 2.748                                       |
| F(000)                                            | 1856                                        | 2756                                        | 1018                                        |
| Crystal size (mm)                                 | 0.060 x 0.060 x 0.040                       | 0.160 x 0.150 x 0.120                       | 0.120 x 0.080 x 0.080                       |
| θ range (°)                                       | 3.344 to 52.321                             | 3.957 to 53.000                             | 3.320 to 52.996                             |
| h, k, l range                                     | -15<=h<=15<br>-23<=k<=23<br>-24<=l<=24      | -16<=h<=16<br>-23<=k<=23<br>-38<=l<=38      | -14<=h<=14<br>-17<=k<=17<br>-19<=l<=19      |
| Refinement method                                 | Full-matrix least-squares on F <sup>2</sup> | Full-matrix least-squares on F <sup>2</sup> | Full-matrix least-squares on F <sup>2</sup> |
| Data / restraints / parameters                    | 17383 / 738 / 910                           | 28922 / 1562 / 1490                         | 9610 / 0 / 543                              |
| Goodness-of-fit on F <sup>2</sup>                 | 1.092                                       | 1.018                                       | 1.022                                       |
| Final R indices [ <i>I</i> >2σ( <i>I</i> )]       | R1 = 0.0611<br>wR2 = 0.1800                 | R1 = 0.0478<br>wR2 = 0.1348                 | R1 = 0.0400<br>wR2 = 0.1470                 |
| R indices (all data)                              | R1 = 0.0741<br>wR2 = 0.1904                 | R1 = 0.0597<br>wR2 = 0.1422                 | R1 = 0.0446<br>wR2 = 0.1550                 |
| Largest diff. peak and hole (e. Å <sup>-3</sup> ) | 2.204 and -0.800                            | 0.691 and -0.678                            | 2.033 and -0.652                            |



**Table S2.** Crystal data and structure refinement for **5** and **7-toluene**

|                                                  | <b>5</b>                                                            | <b>7-toluene</b>                                                                                               |
|--------------------------------------------------|---------------------------------------------------------------------|----------------------------------------------------------------------------------------------------------------|
| Formula                                          | C <sub>31</sub> H <sub>53</sub> BN <sub>7</sub> OSSi <sub>3</sub> Y | C <sub>59</sub> H <sub>82</sub> B <sub>2</sub> CIN <sub>15</sub> S <sub>2</sub> Si <sub>2</sub> Y <sub>2</sub> |
| Formula weight                                   | 755.85                                                              | 1356.58                                                                                                        |
| Temperature (K)                                  | 173                                                                 | 173(2)                                                                                                         |
| Wavelength                                       | 1.34139                                                             | 1.34138                                                                                                        |
| Crystal system                                   | monoclinic                                                          | Monoclinic                                                                                                     |
| Space group                                      | P2 <sub>1</sub> /c                                                  | P2 <sub>1</sub> /c                                                                                             |
| a(Å)                                             | 14.1492(6)                                                          | 25.1705(5)                                                                                                     |
| b(Å)                                             | 29.6721(12)                                                         | 13.2786(3)                                                                                                     |
| c(Å)                                             | 9.7824(4)                                                           | 20.5853(4)                                                                                                     |
| α(deg)                                           | 90                                                                  | 90                                                                                                             |
| β(deg)                                           | 107.0320(10)                                                        | 91.8010(10)                                                                                                    |
| γ(deg)                                           | 90                                                                  | 90                                                                                                             |
| V(Å <sup>3</sup> )                               | 3926.9(3)                                                           | 6876.8(2)                                                                                                      |
| Z                                                | 4                                                                   | 4                                                                                                              |
| D <sub>c</sub> (g/m <sup>3</sup> )               | 1.278                                                               | 1.310                                                                                                          |
| μ (mm <sup>-1</sup> )                            | 2.472                                                               | 2.586                                                                                                          |
| F(000)                                           | 1592                                                                | 2824                                                                                                           |
| Crystal size (mm)                                | 0.420 × 0.360 × 0.240                                               | 0.210 × 0.200 × 0.180                                                                                          |
| θ range (°)                                      | 7.694 to 106.276                                                    | 3.274 to 52.999                                                                                                |
| h, k, l range                                    | -16 ≤ h ≤ 16<br>-35 ≤ k ≤ 35,<br>-11 ≤ l ≤ 11                       | -29 ≤ h ≤ 29<br>-15 ≤ k ≤ 12<br>-24 ≤ l ≤ 24                                                                   |
| Data / restraints / parameters                   | 6888/36/423                                                         | 12130 / 0 / 776                                                                                                |
| Goodness-of-fit on F <sup>2</sup>                | 1.04                                                                | 0.979                                                                                                          |
| Final R indices [I>2σ(I)]                        | R1 = 0.0471<br>wR2 = 0.1206                                         | R1 = 0.0314<br>wR2 = 0.0974                                                                                    |
| R indices (all data)                             | R1 = 0.0495<br>wR2 = 0.1230                                         | R1 = 0.0392<br>wR2 = 0.1056                                                                                    |
| Largest diff. peak and hole (e. Å <sup>3</sup> ) | 1.08 and -0.67                                                      | 0.469 and -0.552                                                                                               |

**Table S3.** Crystal data and structure refinement for **8** and **9**

|                                                  | <b>8</b>                                                            | <b>9</b>                                                                                                     |
|--------------------------------------------------|---------------------------------------------------------------------|--------------------------------------------------------------------------------------------------------------|
| Formula                                          | C <sub>38</sub> H <sub>56</sub> BN <sub>8</sub> OSSi <sub>3</sub> Y | C <sub>60</sub> H <sub>99</sub> B <sub>2</sub> N <sub>15</sub> O <sub>2</sub> Si <sub>6</sub> Y <sub>2</sub> |
| Formula weight                                   | 858.97                                                              | 1430.52                                                                                                      |
| Temperature (K)                                  | 173                                                                 | 173(2)                                                                                                       |
| Wavelength                                       | 1.34138                                                             | 1.34138                                                                                                      |
| Crystal system                                   | monoclinic                                                          | Triclinic                                                                                                    |
| Space group                                      | P21/n                                                               | <i>P</i> -1                                                                                                  |
| a(Å)                                             | 10.6116(13)                                                         | 14.6139(13)                                                                                                  |
| b(Å)                                             | 31.558(4)                                                           | 15.8993(14)                                                                                                  |
| c(Å)                                             | 13.2103(17)                                                         | 18.6213(16)                                                                                                  |
| α(deg)                                           | 90                                                                  | 77.834(3)                                                                                                    |
| β(deg)                                           | 93.169(4)                                                           | 82.261(3)                                                                                                    |
| γ(deg)                                           | 90                                                                  | 86.714(3)                                                                                                    |
| V(Å <sup>3</sup> )                               | 4417.2(10)                                                          | 4189.1(6)                                                                                                    |
| Z                                                | 4                                                                   | 2                                                                                                            |
| D <sub>c</sub> (g/m <sup>3</sup> )               | 1.292                                                               | 1.134                                                                                                        |
| μ (mm <sup>-1</sup> )                            | 2.244                                                               | 2.003                                                                                                        |
| F(000)                                           | 1808                                                                | 1504                                                                                                         |
| Crystal size (mm)                                | 0.230 × 0.120 × 0.080                                               | 0.250 × 0.200 × 0.200                                                                                        |
| h, k, l range                                    | -13 ≤ h ≤ 13<br>-40 ≤ k ≤ 40<br>-16 ≤ l ≤ 16                        | -17 ≤ h ≤ 17<br>-18 ≤ k ≤ 18<br>-22 ≤ l ≤ 22                                                                 |
| Refinement method                                | Full-matrix least-squares on F <sup>2</sup>                         | Full-matrix least-squares on F <sup>2</sup>                                                                  |
| Data / restraints / parameters                   | 9753 / 6 / 496                                                      | 14716 / 0 / 833                                                                                              |
| Goodness-of-fit on F <sup>2</sup>                | 1.022                                                               | 1.028                                                                                                        |
| Final R indices [I > 2σ(I)]                      | R1 = 0.0456<br>wR2 = 0.1246                                         | R1 = 0.0415<br>wR2 = 0.1345                                                                                  |
| R indices (all data)                             | R1 = 0.0487<br>wR2 = 0.1288                                         | R1 = 0.0466<br>wR2 = 0.1400                                                                                  |
| Largest diff. peak and hole (e. Å <sup>3</sup> ) | 0.81 and -1.26                                                      | 0.626 and -0.612                                                                                             |

#### 4. NMR Spectra of All New Compounds

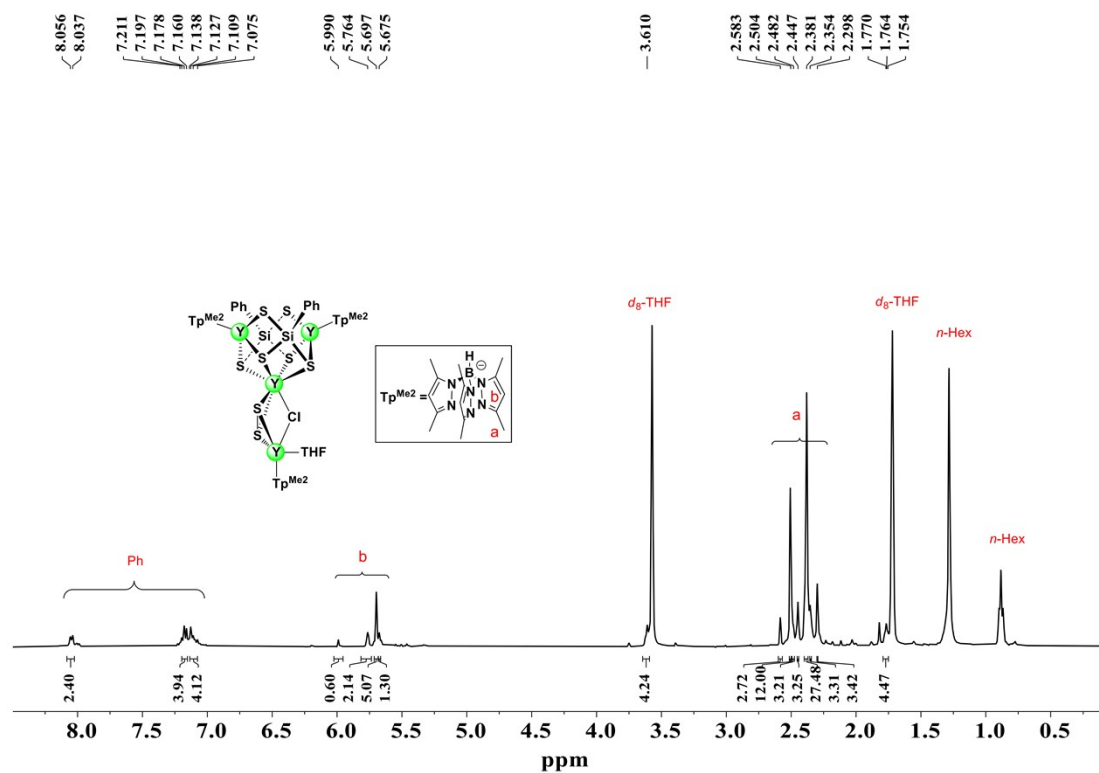

Figure S6.  $^1\text{H}$  NMR spectrum of **2** (25 °C, 400 MHz,  $d_8$ -THF).

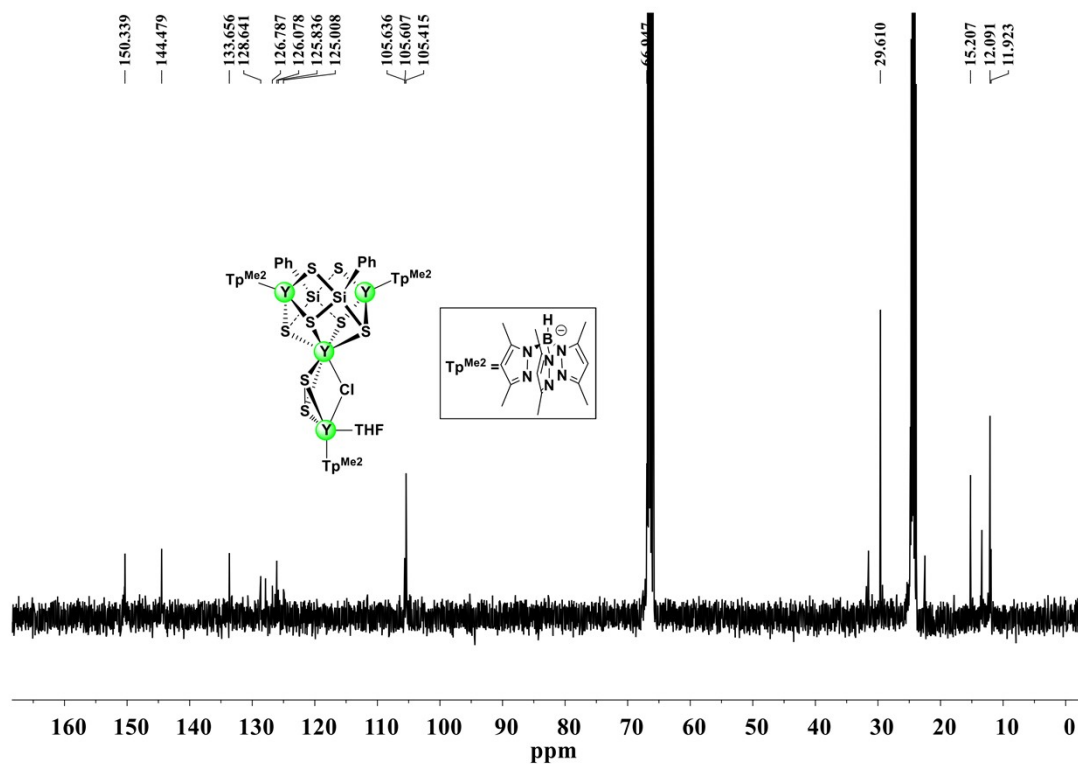

Figure S7.  $^{13}\text{C}$  NMR spectrum of **2** (25 °C, 100 MHz,  $d_8$ -THF).

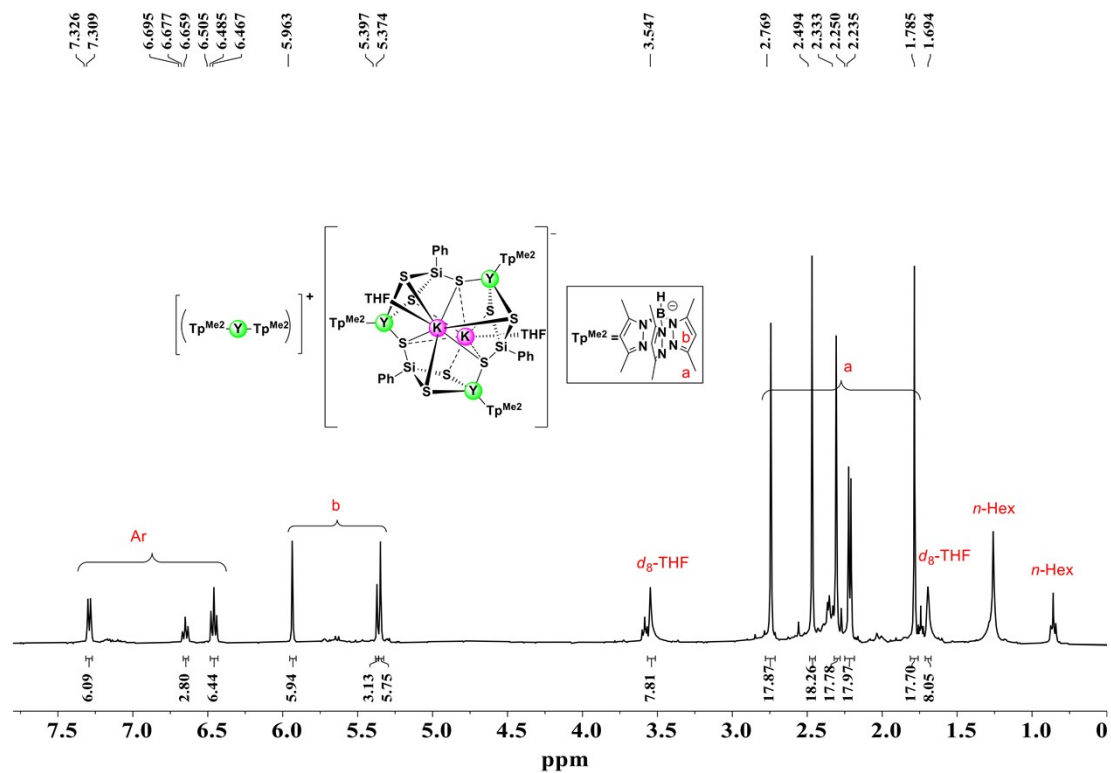

Figure S8.  $^1\text{H}$  NMR spectrum of **3** (25 °C, 400 MHz,  $d_8$ -THF).

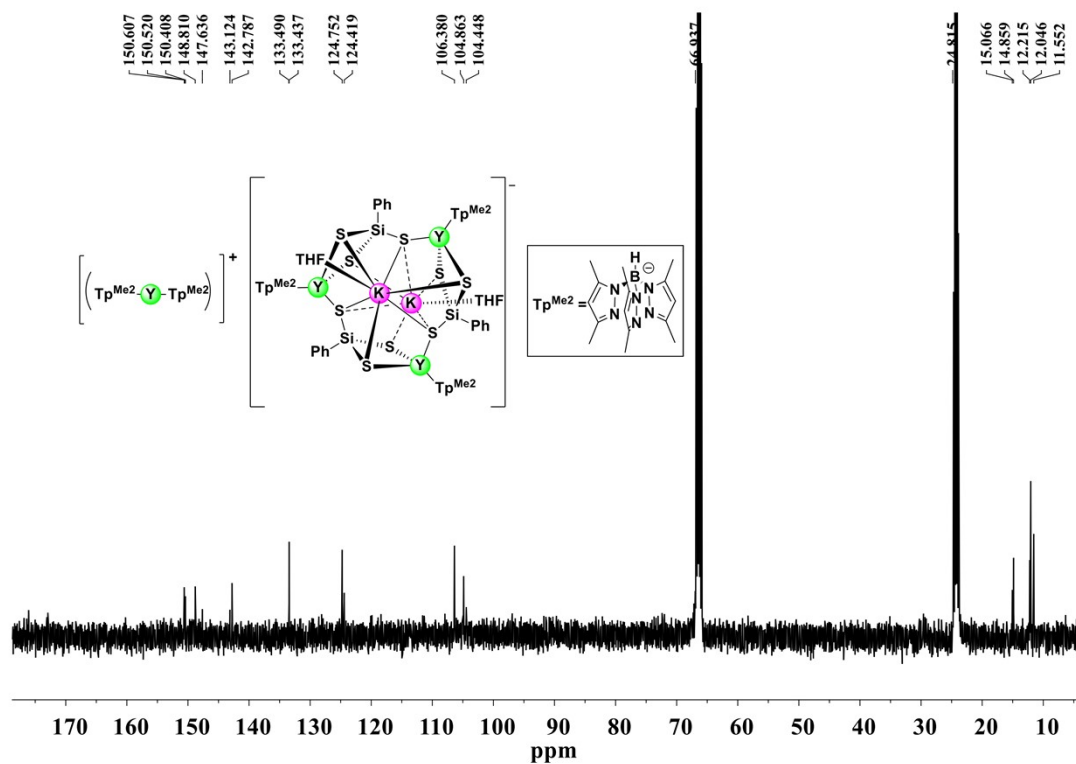

Figure S9.  $^{13}\text{C}$  NMR spectrum of **3** (25 °C, 100 MHz,  $d_8$ -THF).

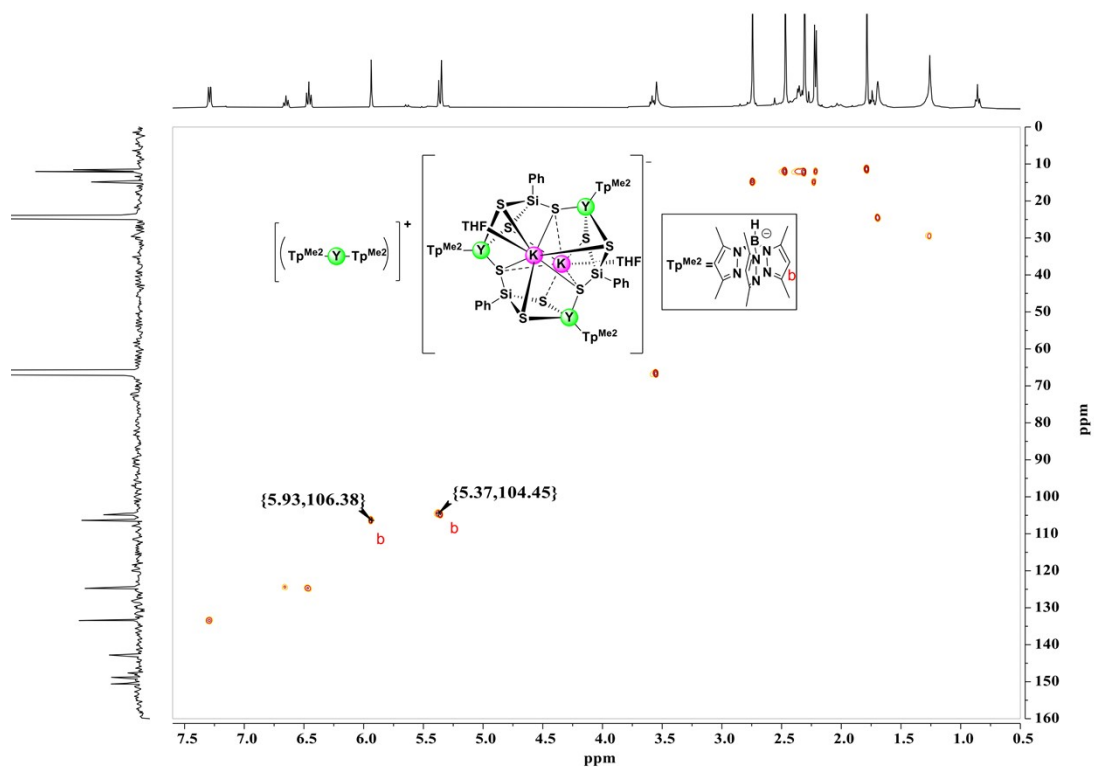

Figure S10. HSQC ( $^1\text{H}$  NMR- $^{13}\text{C}$  NMR) Spectrum of **3** (25  $^\circ\text{C}$ ,  $d_8$ -THF).

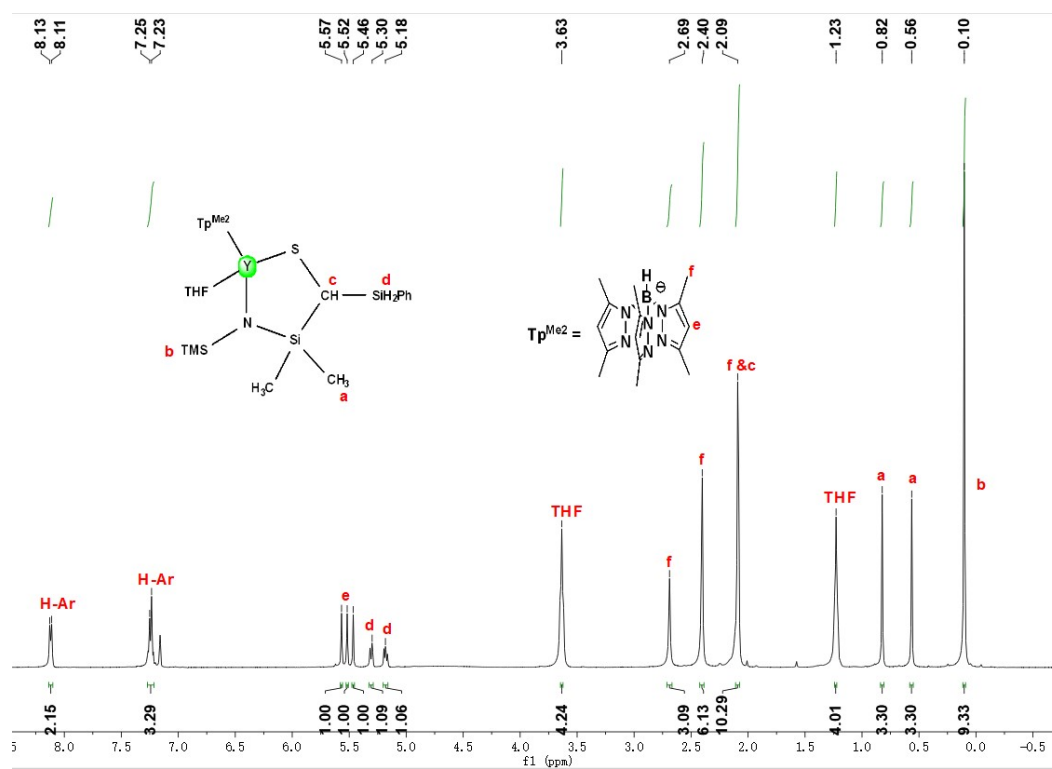

Figure S11.  $^1\text{H}$  NMR spectrum of **5** (25  $^\circ\text{C}$ , 400 MHz,  $\text{C}_6\text{D}_6$ ).

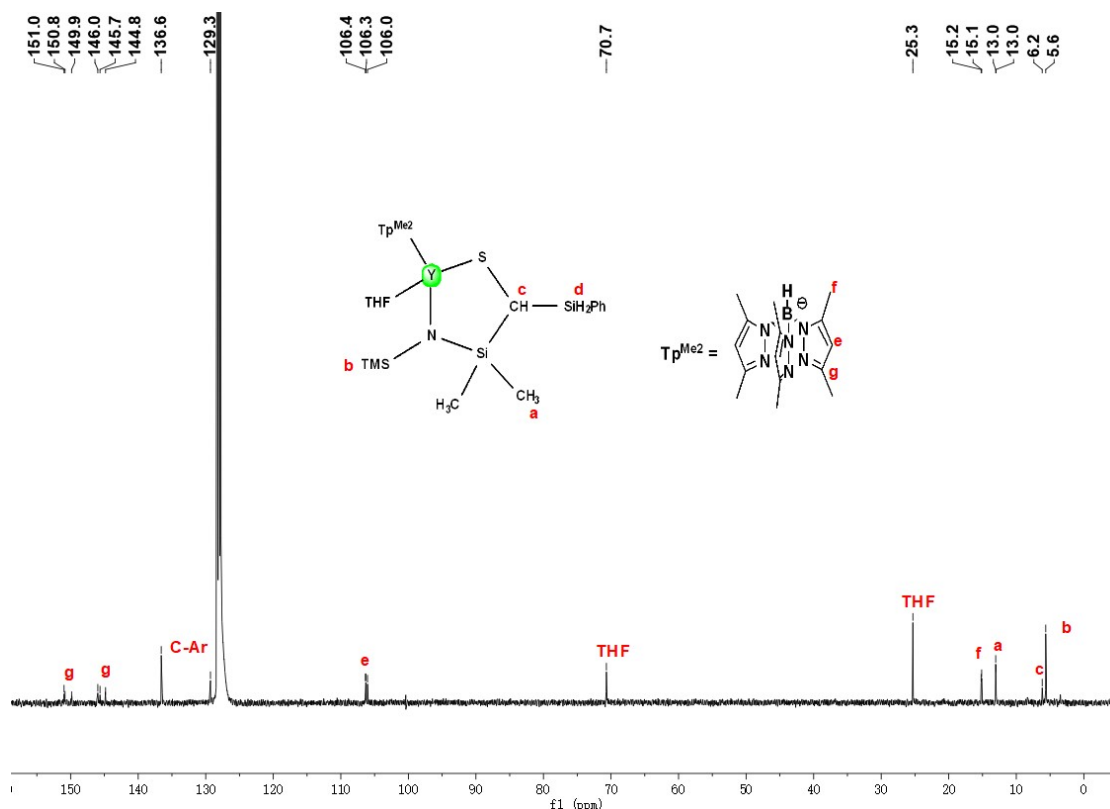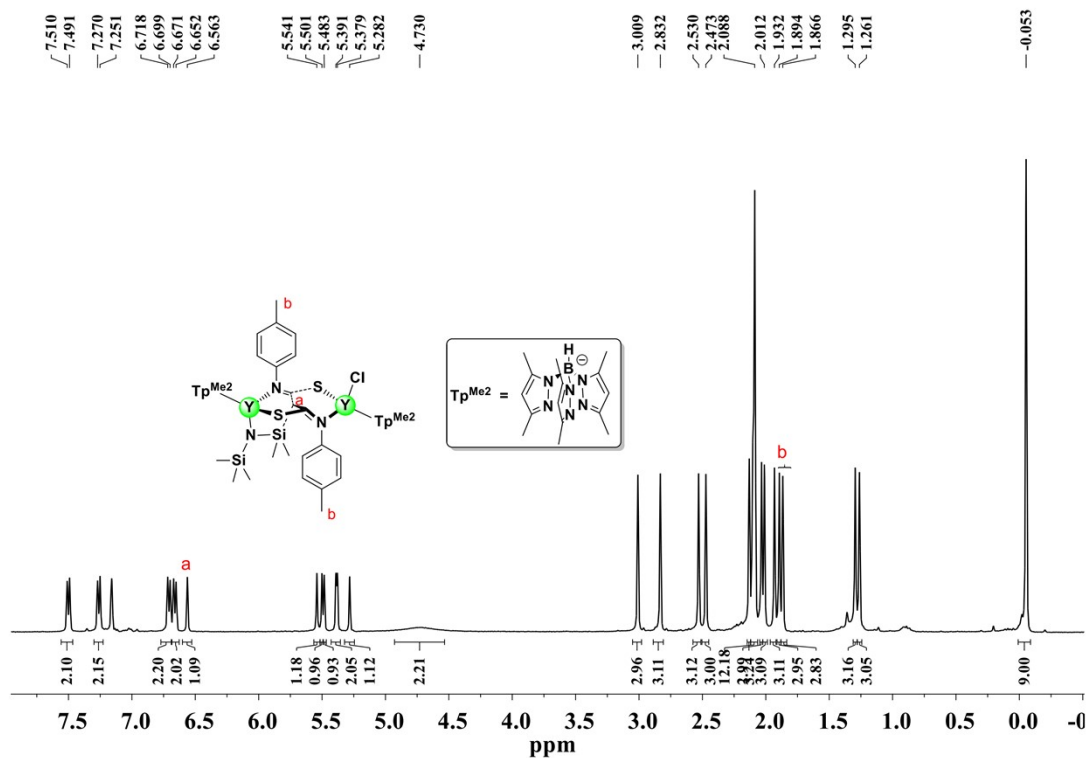

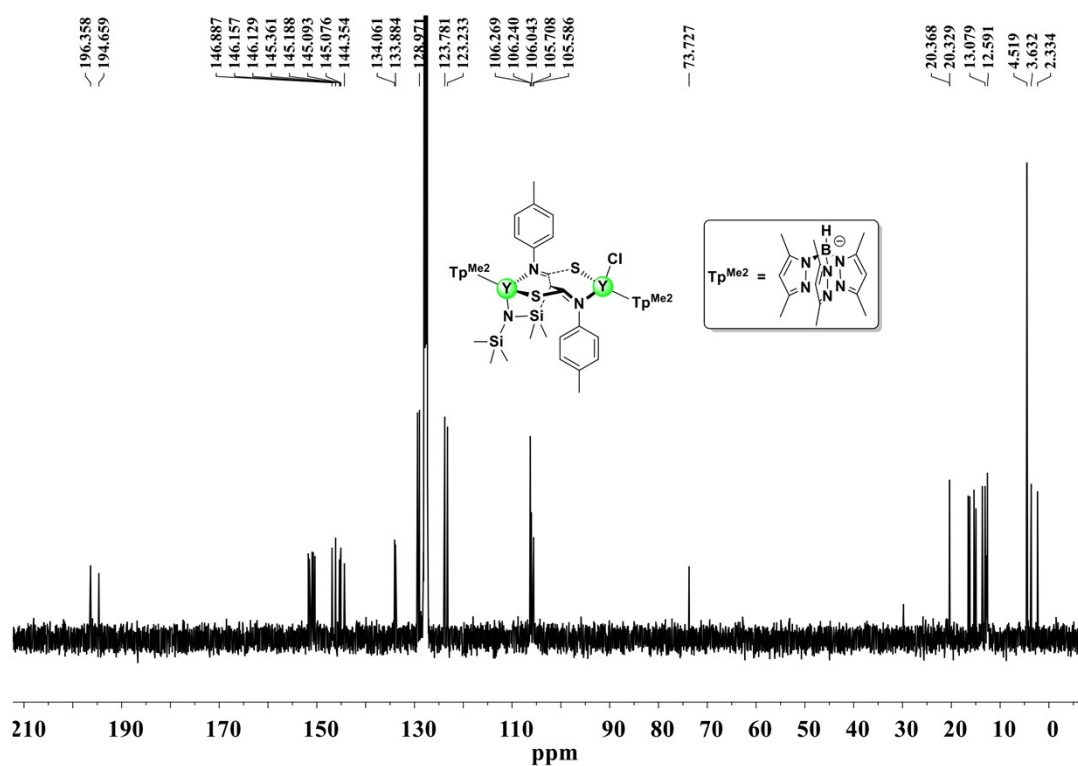

Figure S14.  $^{13}\text{C}$  NMR spectrum of **7** (25 °C, 100 MHz,  $\text{C}_6\text{D}_6$ ).

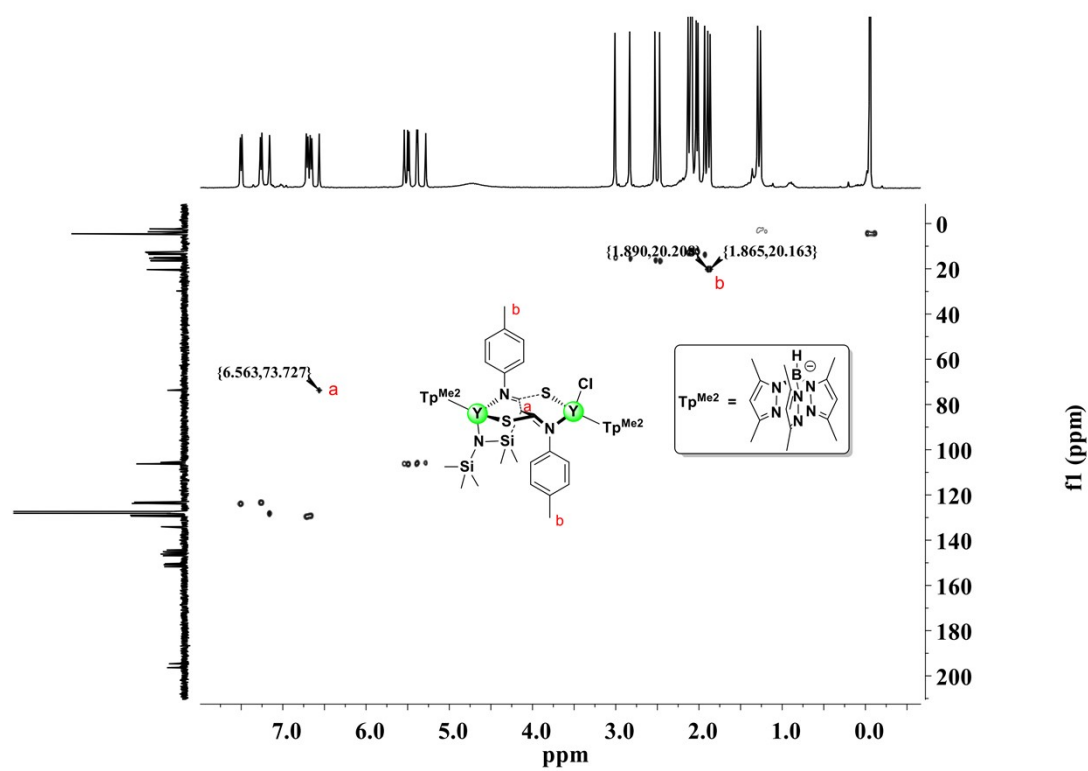

Figure S15. HSQC ( $^1\text{H}$  NMR- $^{13}\text{C}$  NMR) Spectrum of **7** (25 °C,  $\text{C}_6\text{D}_6$ ).

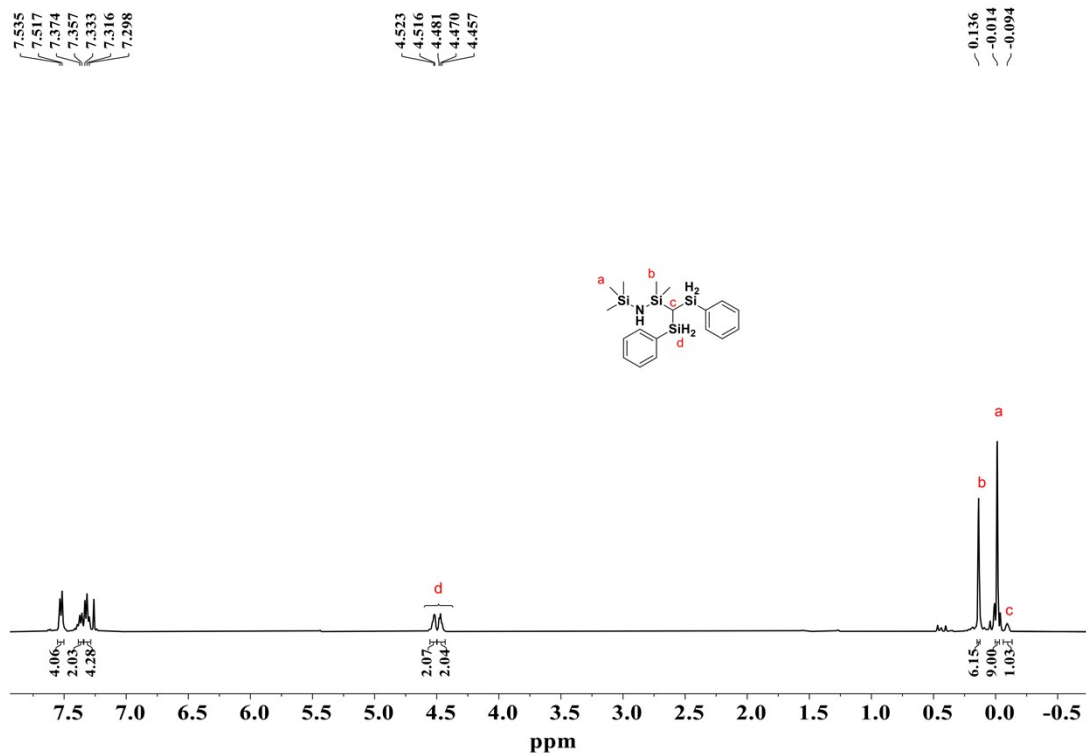

Figure S16. <sup>1</sup>H NMR spectrum of II (25 °C, 400 MHz, CDCl<sub>3</sub>).

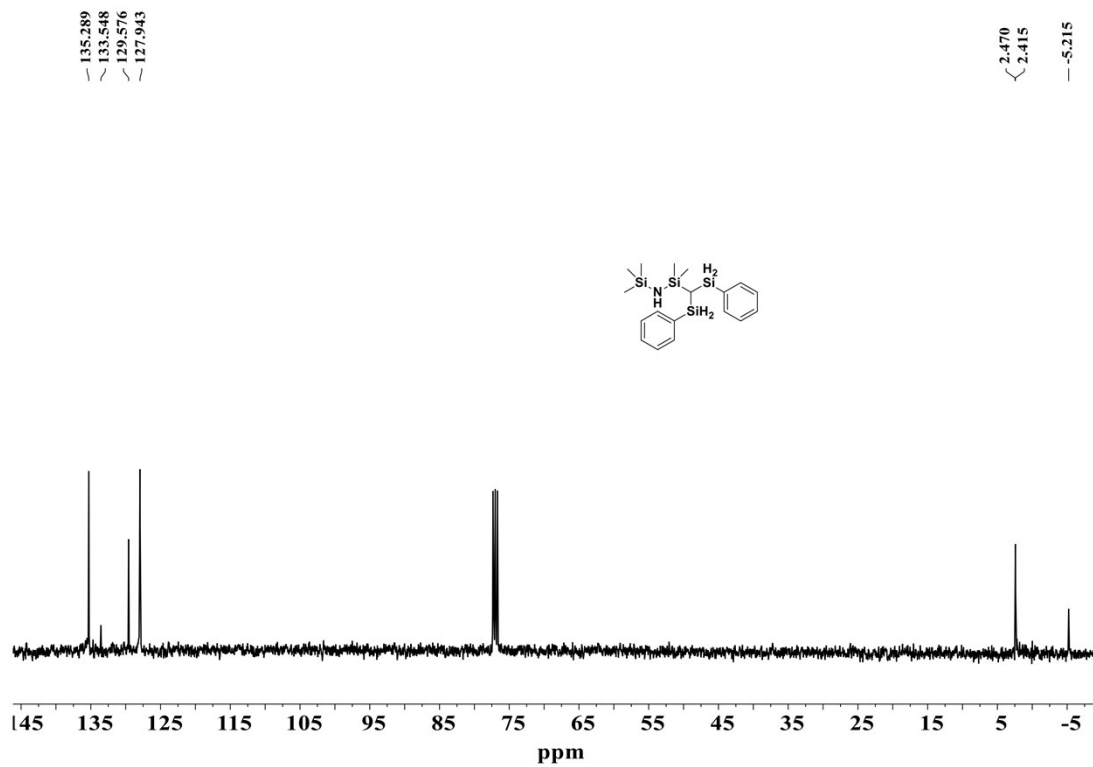

Figure S17. <sup>13</sup>C NMR spectrum of II (25 °C, 100 MHz, CDCl<sub>3</sub>).



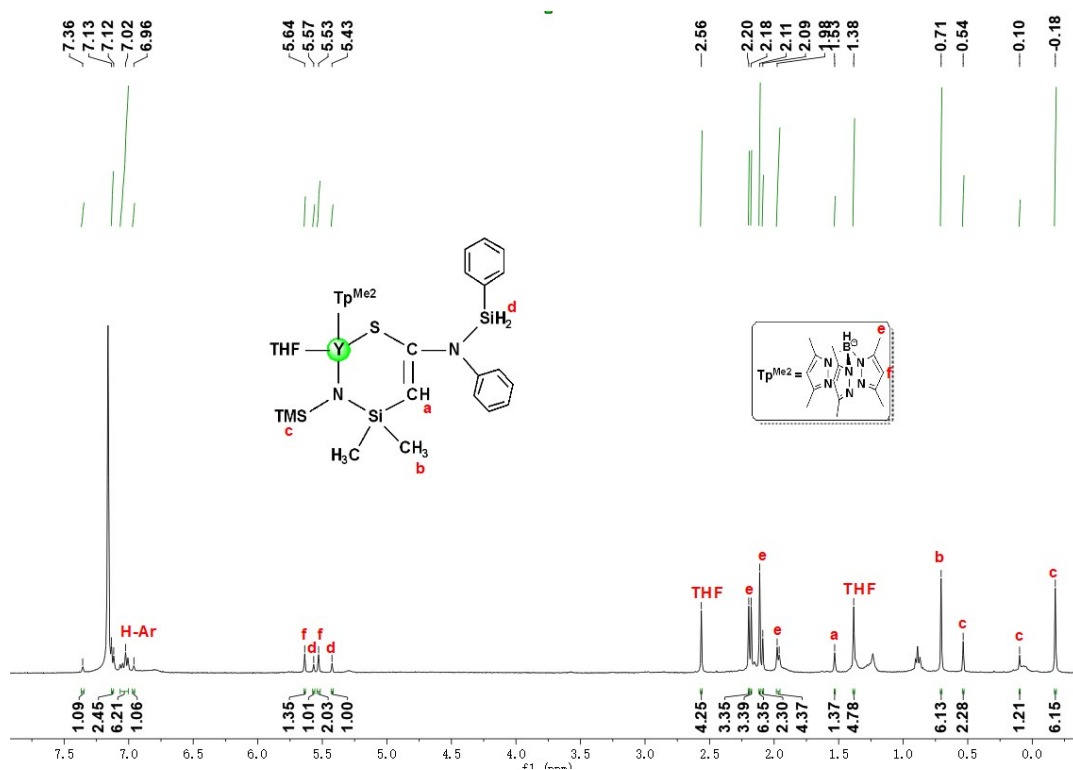

Figure S18. <sup>1</sup>H NMR spectrum of **8** (25 °C, 400 MHz, C<sub>6</sub>D<sub>6</sub>).

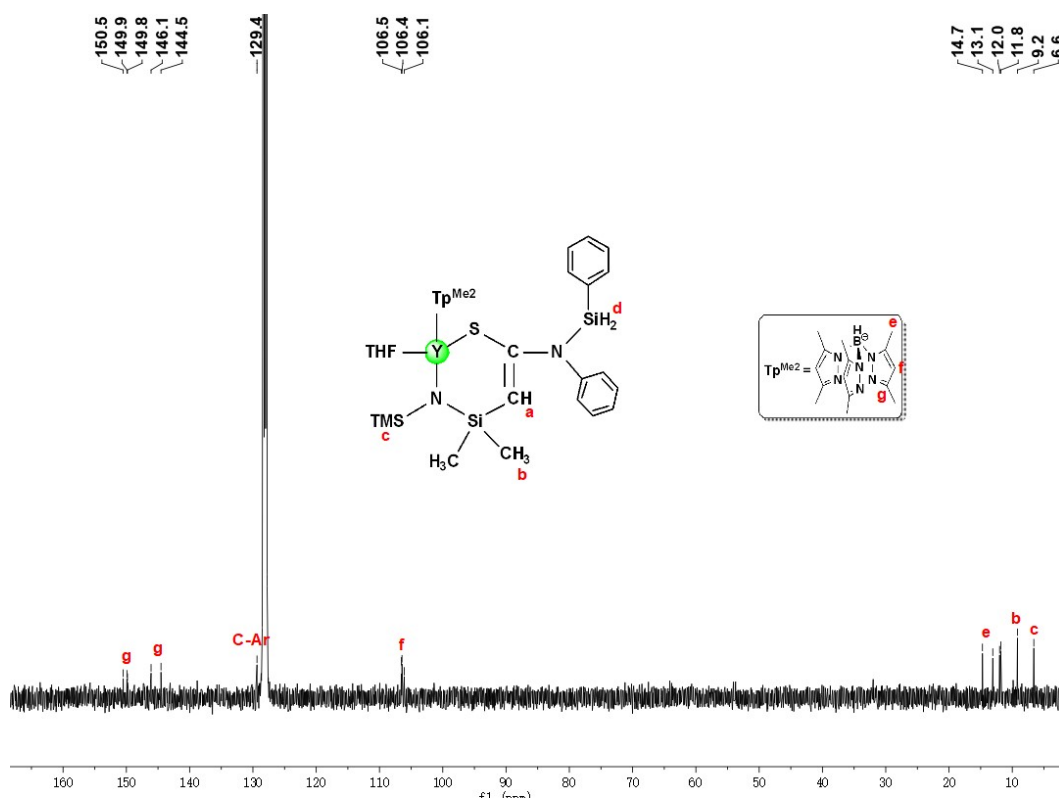

Figure S19. <sup>13</sup>C NMR spectrum of **8** (25 °C, 100 MHz, C<sub>6</sub>D<sub>6</sub>).

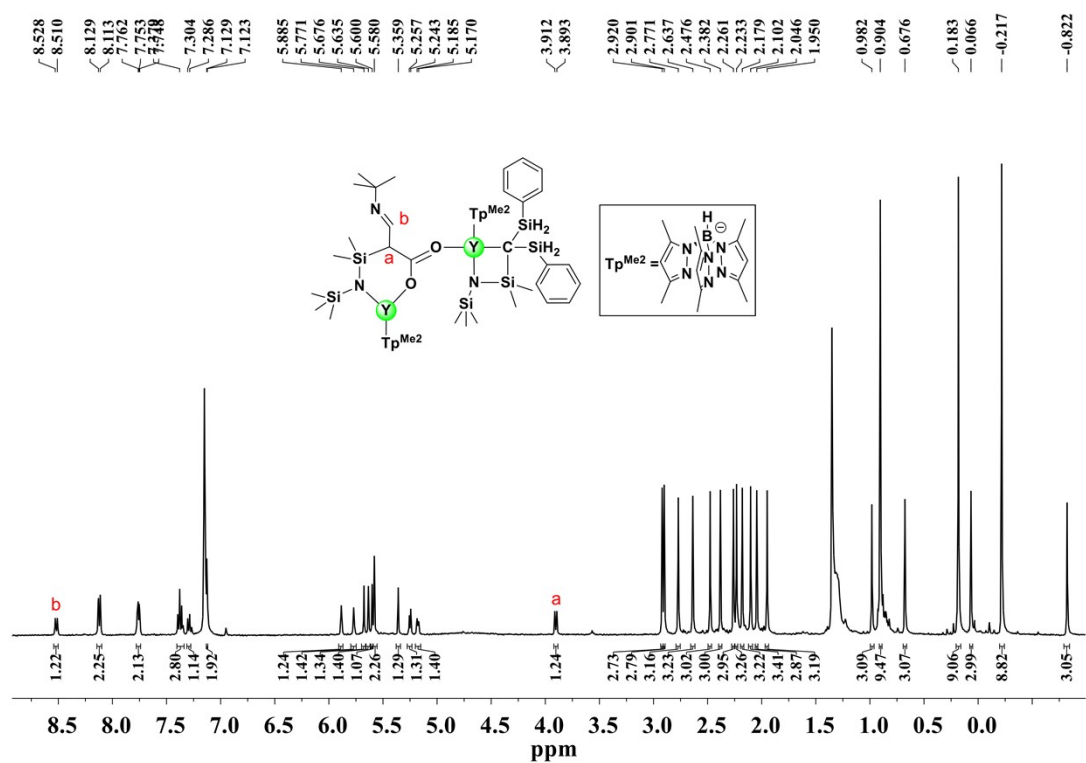

Figure S20.  $^1\text{H}$  NMR spectrum of **9** (25 °C, 400 MHz,  $\text{C}_6\text{D}_6$ ).

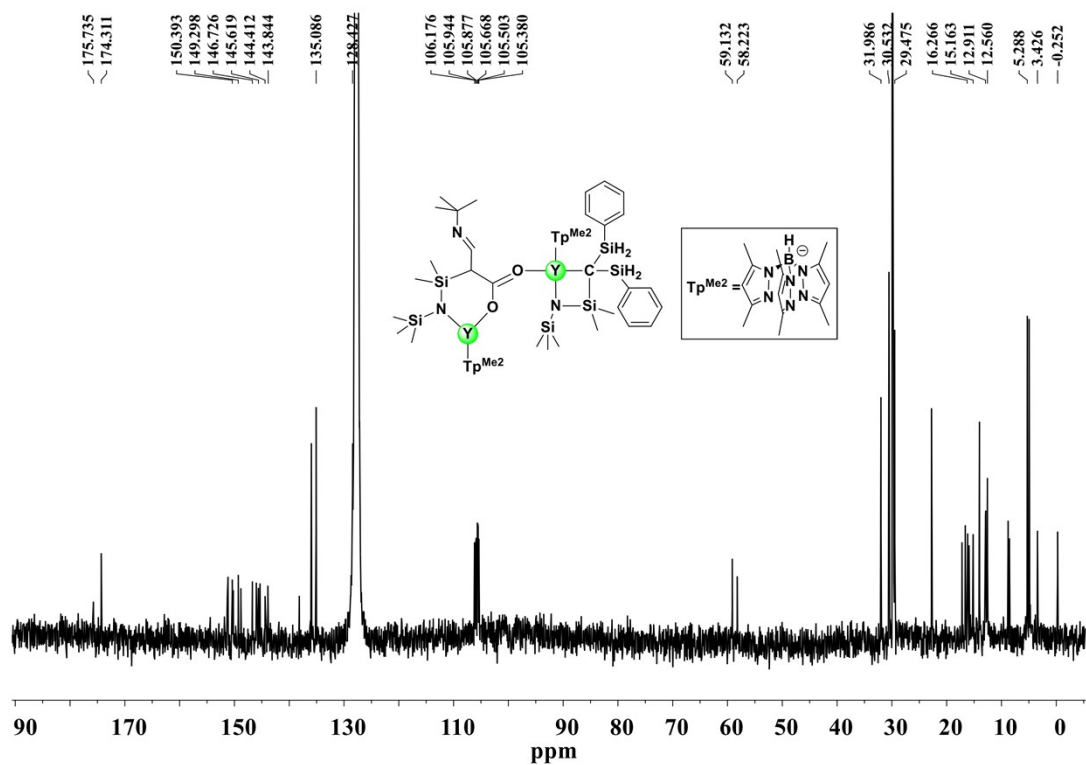

Figure S21.  $^{13}\text{C}$  NMR spectrum of **9** (25 °C, 100 MHz,  $\text{C}_6\text{D}_6$ ).

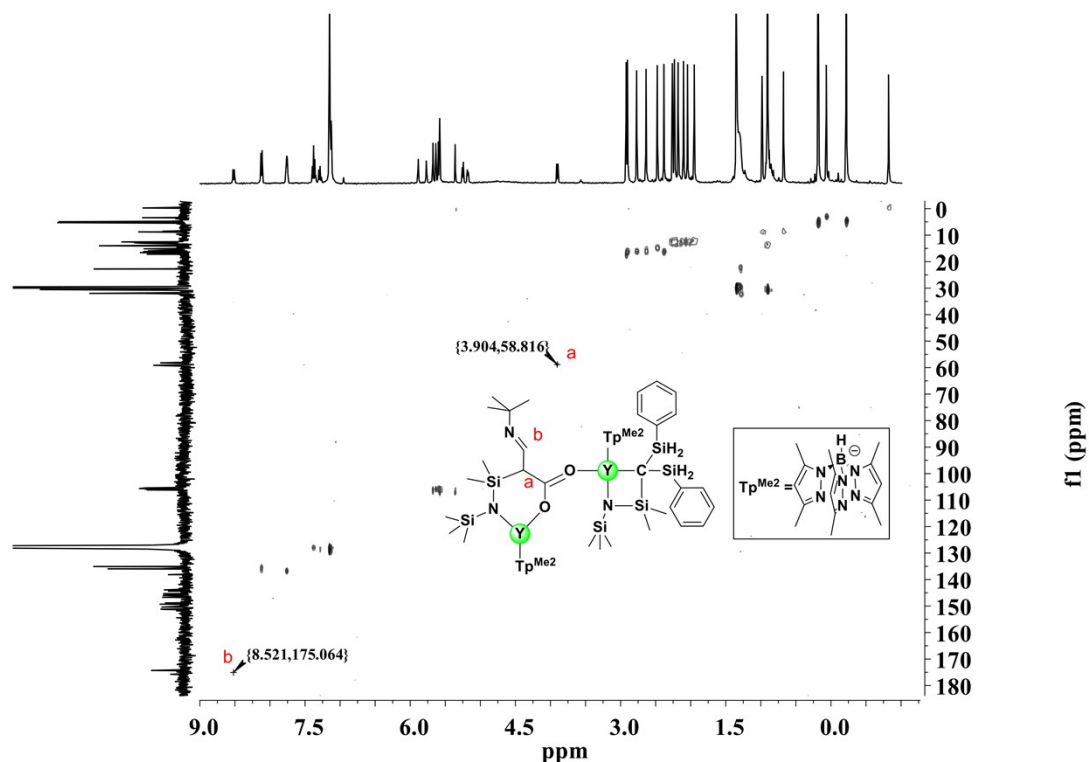

Figure S22. HSQC ( $^1\text{H}$  NMR- $^{13}\text{C}$  NMR) Spectrum of **9** (25 °C,  $\text{C}_6\text{D}_6$ ).

## 5. Optimized Geometries

| Atom | x           | y           | z           |
|------|-------------|-------------|-------------|
| 1    |             |             |             |
| Y    | -0.04780200 | 0.06831200  | 0.17979700  |
| B    | -3.36513200 | 0.31519500  | -1.13195500 |
| N    | -2.33750000 | 0.86564800  | -2.16014300 |
| N    | -0.97334800 | 0.89223900  | -1.90629100 |
| N    | -3.28851500 | 1.14584800  | 0.18152100  |
| N    | -2.12095000 | 1.26400000  | 0.92176100  |
| N    | -3.05387900 | -1.18645400 | -0.84011400 |
| N    | -1.83546500 | -1.61607000 | -0.34019300 |
| N    | 1.92596400  | -0.63532900 | -0.55307400 |
| Si   | 2.35389200  | -2.04449500 | -1.47405400 |
| Si   | 2.90593200  | 0.71814800  | 0.04717000  |
| Si   | 1.33862800  | 3.54506000  | 0.66660200  |
| O    | -0.09017200 | -1.11512400 | 2.20343000  |
| C    | -2.56024700 | 1.37254500  | -3.38338100 |
| C    | -1.35910800 | 1.73696000  | -3.94725500 |
| H    | -1.19477300 | 2.17001600  | -4.90441100 |
| C    | -0.39989300 | 1.41432900  | -2.98162100 |
| C    | -4.23693700 | 1.92058100  | 0.73373400  |
| C    | -3.71470500 | 2.55438100  | 1.83761100  |
| H    | -4.20394300 | 3.24062600  | 2.48619800  |

|   |             |             |             |
|---|-------------|-------------|-------------|
| C | -2.38753200 | 2.11479700  | 1.90452900  |
| C | -3.84117700 | -2.25219900 | -1.05423100 |
| C | -3.15896100 | -3.39494400 | -0.70088900 |
| H | -3.50027300 | -4.40062500 | -0.75763400 |
| C | -1.91081300 | -2.93992500 | -0.26488000 |
| C | 1.09498800  | -2.37328900 | -2.89129200 |
| H | 1.15167300  | -1.58651400 | -3.63905600 |
| H | 1.30670200  | -3.31923600 | -3.38378400 |
| H | 0.07100300  | -2.40360400 | -2.53054000 |
| C | 4.08534300  | -1.98022600 | -2.30670400 |
| H | 4.87934000  | -1.80953700 | -1.58522300 |
| H | 4.29085800  | -2.92235000 | -2.80945700 |
| H | 4.13280800  | -1.19013600 | -3.05036900 |
| C | 2.36168000  | -3.63849100 | -0.38133000 |
| H | 1.40341800  | -3.79219100 | 0.11095400  |
| H | 2.57022500  | -4.52015600 | -0.98196500 |
| H | 3.12576700  | -3.57148000 | 0.38980600  |
| C | 3.73825000  | 1.70602600  | -1.37990700 |
| H | 3.00125600  | 2.12460700  | -2.05988500 |
| H | 4.32593900  | 2.52846200  | -0.98091500 |
| H | 4.40386800  | 1.07273800  | -1.95894800 |
| C | 4.35294500  | 0.13946200  | 1.18168200  |
| H | 5.03878300  | -0.51572800 | 0.65045100  |
| H | 4.91615900  | 1.00051500  | 1.53263000  |
| H | 3.98852500  | -0.39719500 | 2.05326400  |
| C | 1.60229400  | 1.72733100  | 0.98356000  |
| H | 1.69508100  | 1.56486500  | 2.06354700  |
| C | 1.14854100  | -1.49915900 | 2.92057100  |
| H | 1.78346500  | -2.01305200 | 2.22208000  |
| H | 1.62133300  | -0.59251500 | 3.25893200  |
| C | 0.65796400  | -2.36008600 | 4.09102200  |
| H | 0.54595800  | -3.39130000 | 3.78046200  |
| H | 1.33670300  | -2.31479700 | 4.93047100  |
| C | -0.72232100 | -1.74633800 | 4.40306800  |
| H | -1.36141100 | -2.41309900 | 4.96400500  |
| H | -0.60215700 | -0.82133500 | 4.95285900  |
| C | -1.28167100 | -1.46640200 | 3.00411500  |
| H | -1.96553700 | -0.63860800 | 2.95461100  |
| H | -1.72882400 | -2.34401300 | 2.56882200  |
| H | -4.47034600 | 0.40020900  | -1.58723500 |
| H | 0.97373300  | 3.79997800  | -0.77041100 |
| H | 0.17852200  | 4.06517700  | 1.47737200  |
| H | -1.63002000 | 2.39587700  | 2.59888000  |
| H | -5.21210200 | 1.97995800  | 0.31025600  |
| H | 0.65686100  | 1.54027800  | -3.02642000 |
| H | -3.54741500 | 1.44379300  | -3.77611800 |
| H | -1.08235000 | -3.51443800 | 0.08062700  |

|   |             |             |             |
|---|-------------|-------------|-------------|
| H | -4.82548100 | -2.13777000 | -1.44352300 |
| C | 2.78569400  | 4.76090800  | 1.06084000  |
| H | 3.65646800  | 4.54585600  | 0.44916700  |
| H | 2.48302500  | 5.78730300  | 0.87102200  |
| H | 3.07998300  | 4.68154900  | 2.10395200  |

**Int-1**

|    |             |             |             |
|----|-------------|-------------|-------------|
| Y  | -0.25724000 | 0.37495500  | 0.19471900  |
| B  | -3.78677800 | -0.43412300 | 0.16955200  |
| N  | -3.46701400 | 0.46460400  | 1.38030900  |
| N  | -2.20985800 | 0.88438000  | 1.65004700  |
| N  | -2.98396600 | -1.74091000 | 0.26526300  |
| N  | -1.63088800 | -1.74847200 | 0.32607900  |
| N  | -3.41680000 | 0.30747900  | -1.13228600 |
| N  | -2.16325900 | 0.75463500  | -1.37239600 |
| N  | 1.65004100  | 1.56624700  | -0.03283100 |
| Si | 1.93190200  | 3.22803700  | -0.29838500 |
| Si | 2.78237700  | 0.34453700  | 0.44414000  |
| Si | 2.44699300  | -2.61682200 | 1.37794600  |
| C  | -4.32667700 | 0.96022100  | 2.29314200  |
| C  | -3.60824900 | 1.73346400  | 3.19479300  |
| H  | -3.98929500 | 2.27040800  | 4.05101300  |
| C  | -2.28434500 | 1.65301500  | 2.74469300  |
| C  | -3.45915300 | -3.00371300 | 0.25529000  |
| C  | -2.37835700 | -3.87222400 | 0.31148300  |
| H  | -2.40194800 | -4.95228800 | 0.32212400  |
| C  | -1.25619600 | -3.03258900 | 0.35185400  |
| C  | -4.22711200 | 0.62077600  | -2.16339400 |
| C  | -3.47864700 | 1.29930100  | -3.11562000 |
| H  | -3.81851300 | 1.69493500  | -4.06140600 |
| C  | -2.19054700 | 1.35872300  | -2.56873400 |
| C  | 0.50609300  | 3.94123400  | -1.32032900 |
| H  | 0.46887300  | 3.47704600  | -2.31326300 |
| H  | 0.60036900  | 5.02504600  | -1.46140400 |
| H  | -0.45775800 | 3.75319400  | -0.83060600 |
| C  | 2.01117100  | 4.21665100  | 1.31670200  |
| H  | 1.08343600  | 4.09367300  | 1.88937000  |
| H  | 2.15528300  | 5.28943900  | 1.13764700  |
| H  | 2.83744200  | 3.86878300  | 1.94779300  |
| C  | 3.54349000  | 3.57071300  | -1.23181200 |
| H  | 4.41217300  | 3.22596700  | -0.65884400 |
| H  | 3.67808600  | 4.64232000  | -1.42492600 |
| H  | 3.55580700  | 3.05255400  | -2.19797800 |
| C  | 3.97760400  | 0.95121900  | 1.79271900  |
| H  | 4.57092300  | 1.81403200  | 1.45974200  |
| H  | 4.68023200  | 0.15846300  | 2.08006200  |
| H  | 3.42726200  | 1.25241800  | 2.69303000  |

|   |             |             |             |
|---|-------------|-------------|-------------|
| C | 3.89066000  | -0.17375200 | -1.00399100 |
| H | 3.29624900  | -0.42822400 | -1.89098700 |
| H | 4.52533100  | -1.03479600 | -0.75537400 |
| H | 4.55191900  | 0.66123600  | -1.27786400 |
| C | 1.66167900  | -1.00890500 | 1.03689900  |
| H | 1.27970700  | -0.68278000 | 2.02954200  |
| H | -4.96027800 | -0.68375100 | 0.15878800  |
| H | 1.68349200  | -3.84799000 | 0.94917000  |
| H | 3.75619000  | -2.79122400 | 0.66408200  |
| S | 0.23449700  | -1.02497100 | -2.43202400 |
| C | 1.33057100  | -2.16233700 | -2.09429300 |
| N | 2.08225900  | -3.05138500 | -1.92527300 |
| H | -0.20584600 | -3.28452500 | 0.39937200  |
| H | -4.52247200 | -3.19244600 | 0.21013400  |
| H | -5.38090400 | 0.72845100  | 2.23882700  |
| H | -1.38880400 | 2.10505800  | 3.15113400  |
| H | -5.27209900 | 0.34589700  | -2.14492600 |
| H | -1.29114200 | 1.80413800  | -2.97335800 |
| C | 3.17232300  | -3.94225100 | -1.92358300 |
| H | 3.01818100  | -4.72341100 | -1.18316500 |
| H | 3.25951900  | -4.39891700 | -2.90970400 |
| H | 4.08778700  | -3.38040600 | -1.68562400 |
| C | 2.79791300  | -2.87473100 | 3.22233600  |
| H | 3.25812000  | -3.85068500 | 3.42569200  |
| H | 3.47300100  | -2.09494700 | 3.59594200  |
| H | 1.86923600  | -2.81523800 | 3.80340600  |

#### TS-1

|    |             |             |             |
|----|-------------|-------------|-------------|
| Y  | -0.26514600 | 0.37155000  | 0.14359500  |
| B  | -3.79205400 | -0.39181000 | 0.16463000  |
| N  | -3.45180700 | 0.48673600  | 1.38386400  |
| N  | -2.18705600 | 0.89073800  | 1.64201800  |
| N  | -3.00208600 | -1.70990300 | 0.23785100  |
| N  | -1.64917600 | -1.73849300 | 0.29585500  |
| N  | -3.42395100 | 0.36808400  | -1.12670800 |
| N  | -2.17048000 | 0.81846900  | -1.35730600 |
| N  | 1.68353200  | 1.52213300  | 0.02555100  |
| Si | 1.97951900  | 3.18348100  | -0.24251100 |
| Si | 2.80137900  | 0.26284100  | 0.39834300  |
| Si | 2.48585000  | -2.73406500 | 1.29089700  |
| C  | -4.29638200 | 0.98739000  | 2.30781300  |
| C  | -3.55961500 | 1.74750200  | 3.20587200  |
| H  | -3.92550200 | 2.28593700  | 4.06769800  |
| C  | -2.24136800 | 1.65435700  | 2.74153300  |
| C  | -3.49569800 | -2.96575000 | 0.23407700  |
| C  | -2.42806400 | -3.85020300 | 0.29388100  |
| H  | -2.46808000 | -4.92960300 | 0.31188900  |

|   |             |             |             |
|---|-------------|-------------|-------------|
| C | -1.29338200 | -3.02773800 | 0.33029900  |
| C | -4.22676900 | 0.68149100  | -2.16359500 |
| C | -3.47190800 | 1.36374100  | -3.10845300 |
| H | -3.80515900 | 1.75908400  | -4.05674300 |
| C | -2.18778400 | 1.42326900  | -2.55273100 |
| C | 0.56201100  | 3.90431800  | -1.26930400 |
| H | 0.52105400  | 3.43091500  | -2.25768800 |
| H | 0.67087500  | 4.98521300  | -1.42027200 |
| H | -0.40475500 | 3.73322200  | -0.77938500 |
| C | 2.06303500  | 4.16465900  | 1.37492700  |
| H | 1.12427400  | 4.06634100  | 1.93410000  |
| H | 2.24054800  | 5.23334600  | 1.20219400  |
| H | 2.86991800  | 3.78950700  | 2.01571300  |
| C | 3.59629000  | 3.50522100  | -1.17208500 |
| H | 4.45977400  | 3.16191000  | -0.59021800 |
| H | 3.73798300  | 4.57372300  | -1.37583100 |
| H | 3.61082900  | 2.97553200  | -2.13169100 |
| C | 3.93158400  | 0.71383000  | 1.85489000  |
| H | 4.53272100  | 1.60342500  | 1.62687000  |
| H | 4.62630300  | -0.10016400 | 2.09692900  |
| H | 3.34026000  | 0.93051700  | 2.75232500  |
| C | 3.95837500  | -0.16188800 | -1.03761400 |
| H | 3.40698600  | -0.25966500 | -1.97813300 |
| H | 4.49567800  | -1.10032100 | -0.85907900 |
| H | 4.70507200  | 0.63016300  | -1.16694300 |
| C | 1.66361800  | -1.17117200 | 0.78644200  |
| H | 1.09857600  | -0.92515400 | 1.71094500  |
| H | -4.96768400 | -0.63069400 | 0.15887800  |
| H | 1.73170000  | -3.98761500 | 0.94996200  |
| H | 3.85115800  | -2.92688500 | 0.70320500  |
| S | 0.29998800  | -0.98044800 | -2.36253900 |
| C | 1.33332000  | -1.98425400 | -1.57096000 |
| N | 2.08850500  | -2.91170300 | -1.47274900 |
| H | -0.24669900 | -3.29455900 | 0.37603100  |
| H | -4.56177800 | -3.13885700 | 0.19202700  |
| H | -5.35388100 | 0.76907900  | 2.26224400  |
| H | -1.33663700 | 2.09522200  | 3.13970600  |
| H | -5.27049200 | 0.40147000  | -2.15566000 |
| H | -1.28416200 | 1.86575300  | -2.95087400 |
| C | 2.85098500  | -3.79719300 | -2.30243300 |
| H | 2.65794700  | -4.83000500 | -2.00192500 |
| H | 2.59844800  | -3.66779100 | -3.35972300 |
| H | 3.91550100  | -3.59596300 | -2.15250100 |
| C | 2.70216100  | -2.76927600 | 3.17429500  |
| H | 3.17564100  | -3.69649900 | 3.51687000  |
| H | 3.31755300  | -1.92783600 | 3.51126800  |
| H | 1.72788300  | -2.68685600 | 3.67110200  |

**Int-2**

|    |             |             |             |
|----|-------------|-------------|-------------|
| Y  | 0.36785000  | -0.74976600 | -0.10014600 |
| B  | 3.94971300  | -0.14729200 | -0.21422300 |
| N  | 3.21014300  | 0.71734700  | -1.25499700 |
| N  | 1.88817100  | 0.56925500  | -1.50284800 |
| N  | 3.74152600  | -1.62560300 | -0.57183200 |
| N  | 2.49631500  | -2.14379500 | -0.62958200 |
| N  | 3.38245500  | 0.10489800  | 1.19968300  |
| N  | 2.10042400  | -0.17793700 | 1.52279200  |
| N  | -0.86666800 | 1.13743800  | 0.27465900  |
| Si | -0.29755400 | 2.76127400  | 0.54796900  |
| Si | -2.57953400 | 0.88023500  | 0.41136100  |
| Si | -4.56326900 | -0.55104500 | -1.69898500 |
| C  | 3.72460000  | 1.67423700  | -2.05285600 |
| C  | 2.70451100  | 2.16899300  | -2.85538900 |
| H  | 2.77478000  | 2.94072000  | -3.60759400 |
| C  | 1.57214000  | 1.44258000  | -2.46834700 |
| C  | 4.65871900  | -2.57151200 | -0.86140800 |
| C  | 3.98739100  | -3.75840100 | -1.11897900 |
| H  | 4.41671800  | -4.71377900 | -1.38308600 |
| C  | 2.63237400  | -3.43399500 | -0.95879600 |
| C  | 4.04096800  | 0.55406400  | 2.28526900  |
| C  | 3.15971400  | 0.56445600  | 3.35959100  |
| H  | 3.36427500  | 0.86848200  | 4.37543400  |
| C  | 1.95267600  | 0.09880400  | 2.82561400  |
| C  | 1.56037100  | 2.93137700  | 0.83595000  |
| H  | 1.88555100  | 2.43764500  | 1.75534600  |
| H  | 1.77345000  | 4.00274600  | 0.94414600  |
| H  | 2.16935600  | 2.55809800  | 0.01105800  |
| C  | -0.65799300 | 3.92018400  | -0.90643100 |
| H  | -0.22045100 | 3.52890700  | -1.83134200 |
| H  | -0.20734500 | 4.90299900  | -0.71966200 |
| H  | -1.72704200 | 4.07171500  | -1.07812300 |
| C  | -1.04846400 | 3.54031700  | 2.10584300  |
| H  | -2.13842200 | 3.63122000  | 2.07836100  |
| H  | -0.63740100 | 4.54738000  | 2.25015900  |
| H  | -0.78535800 | 2.94775900  | 2.99025000  |
| C  | -3.63051200 | 2.32083300  | -0.21813100 |
| H  | -3.47475800 | 3.21251800  | 0.39712100  |
| H  | -4.69459000 | 2.06645600  | -0.15301100 |
| H  | -3.40908200 | 2.59039400  | -1.25368500 |
| C  | -3.13581400 | 0.58695300  | 2.18958300  |
| H  | -2.64087600 | -0.29355100 | 2.61272300  |
| H  | -4.21860000 | 0.43547600  | 2.25461400  |
| H  | -2.87925700 | 1.45346000  | 2.80800300  |
| C  | -3.03912300 | -0.70728100 | -0.59853500 |



|   |             |             |             |
|---|-------------|-------------|-------------|
| H | -2.22067300 | -0.86963400 | -1.31549000 |
| H | 5.11695600  | 0.12622000  | -0.22604300 |
| H | -4.98455600 | -1.90695900 | -2.16465000 |
| H | -5.73940700 | 0.05419700  | -1.01163800 |
| S | -1.64964200 | -2.65768000 | 0.85772700  |
| C | -3.15614900 | -1.88692700 | 0.32434500  |
| N | -4.33281500 | -2.25019900 | 0.70141900  |
| H | 1.75719400  | -4.06241500 | -1.06293700 |
| H | 5.71334800  | -2.33520500 | -0.86428200 |
| H | 4.77316200  | 1.93004100  | -1.99865000 |
| H | 0.55408100  | 1.50620300  | -2.82757200 |
| H | 5.08499000  | 0.82575000  | 2.22118500  |
| H | 0.99142300  | -0.03819800 | 3.30319300  |
| C | -4.45500800 | -3.32653500 | 1.66011600  |
| H | -5.51151200 | -3.49871100 | 1.88698800  |
| H | -4.03014500 | -4.26837100 | 1.28641400  |
| H | -3.93587100 | -3.09905100 | 2.60162600  |
| C | -4.14284500 | 0.45083500  | -3.23883900 |
| H | -4.99282700 | 0.48037300  | -3.92937300 |
| H | -3.86395600 | 1.48133900  | -3.00310700 |
| H | -3.30083200 | -0.01423200 | -3.76470300 |

### Int-3

|    |             |             |             |
|----|-------------|-------------|-------------|
| Y  | -4.00110900 | 0.09219800  | 0.17774500  |
| B  | -4.54238100 | 3.56231000  | -0.19184400 |
| N  | -5.87895600 | 2.78037700  | -0.36416200 |
| N  | -5.94786900 | 1.39710200  | -0.27716700 |
| N  | -3.96483300 | 3.31178300  | 1.22544800  |
| N  | -3.65261200 | 2.03807800  | 1.68398200  |
| N  | -3.51238100 | 3.09227200  | -1.26629800 |
| N  | -3.03727200 | 1.78822500  | -1.35345800 |
| N  | -4.68855500 | -1.73237800 | -0.84665100 |
| Si | -4.99472500 | -2.13717000 | -2.51428800 |
| Si | -5.03024600 | -2.71111100 | 0.60256100  |
| Si | -5.67226900 | -1.02206400 | 3.34357600  |
| C  | -7.10997600 | 3.25955300  | -0.59197200 |
| C  | -8.00063900 | 2.21022100  | -0.65774100 |
| H  | -9.04954000 | 2.25750400  | -0.82564300 |
| C  | -7.22228200 | 1.06845200  | -0.45421800 |
| C  | -3.69131400 | 4.20316800  | 2.19249800  |
| C  | -3.19833300 | 3.53846800  | 3.29092600  |
| H  | -2.89097200 | 3.95435400  | 4.22012700  |
| C  | -3.19874800 | 2.18795800  | 2.92005600  |
| C  | -2.91087400 | 3.83778600  | -2.20511800 |
| C  | -2.03592100 | 3.04954700  | -2.91872900 |
| H  | -1.40791300 | 3.33715900  | -3.72705300 |
| C  | -2.15454200 | 1.78131700  | -2.34332900 |

|    |             |             |             |
|----|-------------|-------------|-------------|
| C  | -3.82243700 | -1.17901700 | -3.69943600 |
| H  | -3.95479800 | -0.10430100 | -3.61715200 |
| H  | -4.02575600 | -1.45823000 | -4.73035300 |
| H  | -2.78065700 | -1.41339300 | -3.49264100 |
| C  | -6.78181100 | -1.70780500 | -3.08964800 |
| H  | -7.52568900 | -2.20907100 | -2.47601300 |
| H  | -6.93388800 | -2.02044900 | -4.12009000 |
| H  | -6.96682100 | -0.63828200 | -3.03550300 |
| C  | -4.74511800 | -4.00007000 | -2.92432300 |
| H  | -3.74028800 | -4.32593300 | -2.67099100 |
| H  | -4.89692000 | -4.16978800 | -3.98767300 |
| H  | -5.44602000 | -4.63175100 | -2.38562100 |
| C  | -6.88682300 | -3.21919100 | 0.67732800  |
| H  | -7.53956400 | -2.35646500 | 0.77949700  |
| H  | -7.07023100 | -3.87828900 | 1.52147900  |
| H  | -7.17890700 | -3.75013900 | -0.22587100 |
| C  | -4.04440700 | -4.36231300 | 0.65311000  |
| H  | -4.40683500 | -5.06940600 | -0.08660400 |
| H  | -4.14472000 | -4.81976700 | 1.63439700  |
| H  | -2.98835000 | -4.19513700 | 0.46512900  |
| C  | -4.49934600 | -1.51644700 | 1.97635900  |
| H  | -3.56328400 | -1.85499000 | 2.42911600  |
| H  | -4.75009700 | 4.73319600  | -0.34016500 |
| H  | -6.89405100 | -0.34105400 | 2.78858300  |
| H  | -5.03321400 | -0.02267600 | 4.26955100  |
| Y  | 4.72030300  | 0.30685100  | 0.02358400  |
| B  | 7.95776200  | -0.56678400 | 0.93626300  |
| N  | 7.49903000  | -1.49284100 | -0.22146200 |
| N  | 6.22223600  | -1.39815400 | -0.75450900 |
| N  | 7.00233700  | -0.75291800 | 2.15241700  |
| N  | 5.63708700  | -0.48829500 | 2.08120500  |
| N  | 7.92283100  | 0.92758300  | 0.46449100  |
| N  | 6.77997600  | 1.56758300  | -0.01315400 |
| N  | 3.13295900  | -0.43075600 | -1.31119300 |
| Si | 3.15413600  | 0.36288600  | -2.86773100 |
| Si | 1.87585100  | -1.42674900 | -0.60622000 |
| Si | -0.53247800 | -1.08053100 | 1.59196700  |
| C  | 8.14656400  | -2.50209300 | -0.82052000 |
| C  | 7.31198900  | -3.08394600 | -1.75082500 |
| H  | 7.52590700  | -3.90739900 | -2.38862900 |
| C  | 6.12133200  | -2.35889600 | -1.66695000 |
| C  | 7.30642800  | -1.10166700 | 3.41074300  |
| C  | 6.16380900  | -1.07286500 | 4.18016600  |
| H  | 6.07300400  | -1.29371300 | 5.21617200  |
| C  | 5.15197600  | -0.67511900 | 3.30463900  |
| C  | 8.93655700  | 1.80320600  | 0.46322000  |
| C  | 8.49091300  | 3.02005100  | -0.00723400 |

|   |             |             |             |
|---|-------------|-------------|-------------|
| H | 9.05142300  | 3.91543700  | -0.12725300 |
| C | 7.14095300  | 2.81844700  | -0.28812200 |
| C | 4.55222900  | 1.69949200  | -2.74100600 |
| H | 4.33383400  | 2.44918600  | -1.97766800 |
| H | 4.60037400  | 2.24021300  | -3.68245000 |
| H | 5.55132800  | 1.29700200  | -2.57862900 |
| C | 3.61068800  | -0.76383100 | -4.34981700 |
| H | 4.61898100  | -1.15726900 | -4.25913000 |
| H | 3.55602100  | -0.20410800 | -5.28019500 |
| H | 2.92773100  | -1.60530500 | -4.43194800 |
| C | 1.55925600  | 1.31280600  | -3.33205200 |
| H | 0.81264600  | 0.64854800  | -3.75644800 |
| H | 1.78123900  | 2.07563600  | -4.07435600 |
| H | 1.12840100  | 1.79800800  | -2.46218100 |
| C | 2.61019300  | -3.11947400 | -0.07160800 |
| H | 2.90278300  | -3.69733600 | -0.94460300 |
| H | 1.89478700  | -3.70993300 | 0.49190100  |
| H | 3.49666700  | -2.99850300 | 0.54871400  |
| C | 0.41351000  | -1.76852600 | -1.79128500 |
| H | -0.17229200 | -0.87139100 | -1.95362100 |
| H | -0.25086700 | -2.52682000 | -1.38637900 |
| H | 0.76576300  | -2.12609200 | -2.75508300 |
| C | 1.23389900  | -0.59056000 | 1.03094000  |
| H | 1.89744800  | -0.92405200 | 1.82665300  |
| H | 9.07562600  | -0.84088200 | 1.26165300  |
| H | -0.91559500 | -0.27088100 | 2.77554600  |
| H | -1.57657700 | -0.84462500 | 0.53989000  |
| S | 2.88056400  | 1.71066400  | 1.50229200  |
| C | 1.27780700  | 0.92094800  | 0.95929400  |
| N | 0.24546600  | 1.53666600  | 0.60112500  |
| H | -7.52646000 | 0.04827400  | -0.43367600 |
| H | -7.28072200 | 4.30562000  | -0.69366800 |
| H | -3.86422700 | 5.24353000  | 2.04455600  |
| H | -2.90168600 | 1.34381700  | 3.49613900  |
| H | 5.21545800  | -2.49072400 | -2.20941100 |
| H | 9.14737700  | -2.74909500 | -0.55345700 |
| H | 4.12254100  | -0.49455900 | 3.50972300  |
| H | 8.30642700  | -1.34269700 | 3.68634000  |
| H | 6.43570500  | 3.51942800  | -0.67168900 |
| H | 9.90755400  | 1.51668800  | 0.79292900  |
| C | -0.60242000 | -2.93474300 | 2.07118600  |
| H | -0.46101800 | -3.58481800 | 1.21397000  |
| H | 0.17283100  | -3.16254400 | 2.79790000  |
| H | -1.56062700 | -3.18006700 | 2.51416500  |
| C | 0.13839700  | 2.99924900  | 0.52434500  |
| H | -0.55296500 | 3.32564600  | 1.29074000  |
| H | 1.08931800  | 3.49498500  | 0.66466700  |

|   |             |             |             |
|---|-------------|-------------|-------------|
| H | -0.28160500 | 3.26157800  | -0.43615700 |
| C | -6.33242400 | -2.41106800 | 4.51041900  |
| H | -6.96222300 | -1.98601300 | 5.28749900  |
| H | -6.91812400 | -3.14131400 | 3.96102100  |
| H | -5.50816100 | -2.93227700 | 4.98990000  |
| H | -1.64284400 | 0.88888000  | -2.61265700 |
| H | -3.13553700 | 4.87349800  | -2.30805300 |

**TS-2**

|    |             |             |             |
|----|-------------|-------------|-------------|
| Y  | -2.83302200 | -0.45892600 | -0.10580300 |
| B  | -4.91194400 | -3.14328700 | -1.34560100 |
| H  | -5.60454300 | -4.02995500 | -1.76330700 |
| N  | -5.78421800 | -1.92704100 | -0.98996100 |
| C  | -7.12473500 | -1.80646900 | -1.07484100 |
| H  | -7.72943100 | -2.62368000 | -1.44186800 |
| C  | -7.47516000 | -0.53728500 | -0.63325800 |
| H  | -8.46638200 | -0.11207000 | -0.57368900 |
| C  | -6.25717900 | 0.06275800  | -0.28744200 |
| H  | -6.04927800 | 1.05062300  | 0.09574000  |
| N  | -5.24351100 | -0.78511900 | -0.50583100 |
| N  | -3.89159800 | -2.73422400 | -2.42398100 |
| C  | -3.57690200 | -3.40308600 | -3.55205700 |
| H  | -4.11129300 | -4.30148700 | -3.82746200 |
| C  | -2.54880600 | -2.72059700 | -4.18815300 |
| H  | -2.06883200 | -2.97517000 | -5.12177300 |
| C  | -2.28596600 | -1.62725100 | -3.35273400 |
| H  | -1.55284400 | -0.83886700 | -3.45453100 |
| N  | -3.09919800 | -1.64396400 | -2.28924600 |
| N  | -4.16988800 | -3.63566100 | -0.08550600 |
| C  | -4.27633800 | -4.83186900 | 0.52889800  |
| H  | -4.92122400 | -5.60146400 | 0.12892700  |
| C  | -3.45575200 | -4.81817200 | 1.64822400  |
| H  | -3.30219300 | -5.61469900 | 2.36152300  |
| C  | -2.87435900 | -3.54227600 | 1.63990600  |
| H  | -2.16404200 | -3.10637800 | 2.32964700  |
| N  | -3.30976100 | -2.83938700 | 0.58831200  |
| N  | -3.38046400 | 1.61885100  | 0.79108600  |
| Si | -4.05852100 | 1.69511600  | 2.37615800  |
| C  | -4.49604500 | -0.05364600 | 2.96953500  |
| H  | -5.20576500 | -0.54223600 | 2.29313600  |
| H  | -4.96125300 | -0.00530400 | 3.96207800  |
| H  | -3.61304300 | -0.69744700 | 3.05651700  |
| C  | -5.65667200 | 2.70797200  | 2.50790300  |
| H  | -5.51968100 | 3.74178900  | 2.17387800  |
| H  | -5.98599100 | 2.74138400  | 3.55411500  |
| H  | -6.47117000 | 2.27147900  | 1.91940200  |
| C  | -2.91276500 | 2.40643100  | 3.70918700  |

|    |             |             |             |
|----|-------------|-------------|-------------|
| H  | -2.63261800 | 3.44459100  | 3.50462600  |
| H  | -1.99151300 | 1.82535500  | 3.80567100  |
| H  | -3.42292600 | 2.38433500  | 4.68088100  |
| Si | -3.28171000 | 3.07119400  | -0.14492400 |
| C  | -2.06476700 | 2.89379700  | -1.58062100 |
| H  | -2.63191700 | 2.27963000  | -2.30126500 |
| C  | -4.95965100 | 3.46901500  | -0.93956200 |
| H  | -5.27017100 | 2.64074500  | -1.58826200 |
| H  | -4.91265700 | 4.37520400  | -1.55455700 |
| H  | -5.74289600 | 3.61415300  | -0.18784100 |
| C  | -2.80178100 | 4.60230600  | 0.86535100  |
| H  | -3.42424400 | 4.71783300  | 1.75865500  |
| Y  | 3.82362900  | -0.04355100 | 0.52077300  |
| B  | 6.59187800  | -0.26663800 | -1.74225000 |
| H  | 7.49415600  | -0.35003900 | -2.52853500 |
| N  | 7.03855100  | 0.52240000  | -0.50221500 |
| C  | 8.13388100  | 1.29053300  | -0.33815000 |
| H  | 8.90132500  | 1.32515300  | -1.09854800 |
| C  | 8.04107800  | 1.92068400  | 0.89585600  |
| H  | 8.75533800  | 2.59419400  | 1.34616600  |
| C  | 6.82282700  | 1.47392500  | 1.42492000  |
| H  | 6.35608600  | 1.70538400  | 2.37359700  |
| N  | 6.22628200  | 0.63061100  | 0.57172700  |
| N  | 5.40836600  | 0.48216100  | -2.39345500 |
| C  | 5.22390800  | 0.72195500  | -3.70612900 |
| H  | 5.96831600  | 0.42104900  | -4.42963000 |
| C  | 4.01202800  | 1.38058100  | -3.86411900 |
| H  | 3.56777200  | 1.73140700  | -4.78402100 |
| C  | 3.51012200  | 1.50344700  | -2.56452500 |
| H  | 2.58342000  | 1.94835400  | -2.23055600 |
| N  | 4.35910200  | 0.96317300  | -1.67707300 |
| N  | 6.15926600  | -1.68358900 | -1.31728300 |
| C  | 6.73432200  | -2.85828700 | -1.64596800 |
| H  | 7.58441400  | -2.88706900 | -2.31267500 |
| C  | 6.04203700  | -3.87640500 | -1.00439100 |
| H  | 6.23598400  | -4.93779100 | -1.05464600 |
| C  | 5.03358000  | -3.21710300 | -0.28989000 |
| H  | 4.25444600  | -3.62486900 | 0.33982100  |
| N  | 5.11398400  | -1.89493200 | -0.48539000 |
| N  | 2.22962400  | 0.07627000  | 2.18250100  |
| Si | 2.52517000  | -0.61227900 | 3.73930400  |
| C  | 4.40444500  | -0.77120400 | 4.01545500  |
| H  | 4.76262000  | 0.00081200  | 4.70724800  |
| H  | 5.00200600  | -0.66066400 | 3.10441600  |
| H  | 4.64512100  | -1.75011900 | 4.44864800  |
| C  | 1.88352800  | 0.44160300  | 5.17583600  |
| H  | 2.40406400  | 1.40583400  | 5.21464100  |

|    |             |             |             |
|----|-------------|-------------|-------------|
| H  | 2.05453500  | -0.06840200 | 6.13257000  |
| H  | 0.81023900  | 0.64427900  | 5.09787900  |
| C  | 1.74915400  | -2.34222300 | 3.91220600  |
| H  | 2.38318900  | -3.00653700 | 4.51129400  |
| H  | 1.61672600  | -2.80497400 | 2.92749900  |
| H  | 0.76476000  | -2.30421100 | 4.39273400  |
| Si | 0.65350800  | 0.67993400  | 1.78655300  |
| C  | 0.42038400  | 2.46541000  | 2.34306000  |
| H  | 0.37011600  | 2.51237100  | 3.43660600  |
| H  | -0.50188400 | 2.89447900  | 1.94134800  |
| H  | 1.25974200  | 3.08815000  | 2.01793600  |
| C  | -0.69046100 | -0.35861800 | 2.60650800  |
| H  | -0.68353700 | -1.37802800 | 2.21182600  |
| H  | -1.67052400 | 0.08559400  | 2.42104200  |
| H  | -0.56269900 | -0.40835700 | 3.69175700  |
| C  | 0.51735900  | 0.55074300  | -0.11133400 |
| H  | 1.51323800  | 0.91969000  | -0.39504200 |
| C  | 0.48981800  | -0.88470800 | -0.50867100 |
| S  | 2.04101600  | -1.61922100 | -0.94185900 |
| N  | -0.62734800 | -1.55820000 | -0.52013800 |
| C  | -0.57815600 | -2.95917300 | -0.90595500 |
| H  | -1.59019100 | -3.34596400 | -1.01779400 |
| H  | -0.04145000 | -3.10180200 | -1.85105000 |
| H  | -0.06159400 | -3.56119900 | -0.14616100 |
| H  | -2.92958300 | 5.50868500  | 0.26085300  |
| H  | -1.75545800 | 4.56517900  | 1.18735400  |
| Si | -1.76518700 | 4.50755000  | -2.46908300 |
| H  | -1.07864600 | 5.52160100  | -1.61320700 |
| H  | -3.06668000 | 5.16084800  | -2.83875700 |
| Si | -0.47126300 | 1.80834400  | -1.30768900 |
| H  | -1.58352000 | 0.54970400  | -1.46788600 |
| H  | 0.05954200  | 1.43290200  | -2.67498200 |
| C  | 0.73190700  | 3.29716200  | -0.87151700 |
| H  | 1.72153000  | 2.99155400  | -0.51194500 |
| H  | 0.89473700  | 3.93001800  | -1.75396600 |
| H  | 0.29065600  | 3.93938200  | -0.10171800 |
| C  | -0.79683400 | 4.29533600  | -4.07752900 |
| H  | 0.04666500  | 3.61066400  | -3.94460100 |
| H  | -1.44362900 | 3.87780500  | -4.85737600 |
| H  | -0.40557400 | 5.25116400  | -4.44251900 |

#### Int-4

|   |             |             |             |
|---|-------------|-------------|-------------|
| Y | -2.56878700 | -0.53826100 | 0.31682700  |
| B | -5.29058300 | -2.71556200 | -0.79356200 |
| N | -5.71300800 | -1.26320500 | -1.04678400 |
| N | -4.88809400 | -0.23213100 | -0.74730800 |
| N | -4.01526700 | -3.00297700 | -1.60775900 |

|    |             |             |             |
|----|-------------|-------------|-------------|
| N  | -2.92638100 | -2.20525500 | -1.53181400 |
| N  | -5.03828000 | -2.89249000 | 0.71632100  |
| N  | -4.22547700 | -2.06082800 | 1.40172100  |
| N  | -2.58613300 | 1.83197600  | 0.19460700  |
| Si | -3.51194200 | 2.75210000  | 1.32627200  |
| Si | -1.92434900 | 2.58917100  | -1.20052700 |
| Si | 0.51537200  | 3.98245500  | 0.23575100  |
| C  | -6.87040700 | -0.80554200 | -1.56826200 |
| C  | -6.80323100 | 0.57977500  | -1.61441600 |
| H  | -7.55546800 | 1.26466900  | -1.97807400 |
| C  | -5.53909600 | 0.88400300  | -1.08854800 |
| C  | -3.81923200 | -3.96969100 | -2.52878700 |
| C  | -2.55526300 | -3.79842900 | -3.07581400 |
| H  | -2.08192000 | -4.39695100 | -3.84038000 |
| C  | -2.03681400 | -2.67611800 | -2.41283100 |
| C  | -5.59715600 | -3.79222900 | 1.55186800  |
| C  | -5.13140500 | -3.53921300 | 2.83523500  |
| H  | -5.38133000 | -4.06899900 | 3.74280700  |
| C  | -4.27140300 | -2.44206600 | 2.68313200  |
| C  | -4.50531400 | 1.54392200  | 2.39130400  |
| H  | -5.23440100 | 0.98386900  | 1.79618000  |
| H  | -5.04933900 | 2.07075300  | 3.18452700  |
| H  | -3.84104500 | 0.81799500  | 2.87821800  |
| C  | -4.71206600 | 4.01315600  | 0.56083900  |
| H  | -4.16678600 | 4.75575700  | -0.03382600 |
| H  | -5.21353500 | 4.55611600  | 1.37219900  |
| H  | -5.49244600 | 3.58554100  | -0.07487400 |
| C  | -2.56550500 | 3.84469500  | 2.55323800  |
| H  | -1.83169900 | 3.29304200  | 3.14488000  |
| H  | -3.29213600 | 4.28810100  | 3.24667700  |
| H  | -2.04551500 | 4.66918800  | 2.05574000  |
| C  | -0.72397700 | 1.41400800  | -2.07646600 |
| H  | 0.27164700  | 1.39629500  | -1.62364000 |
| H  | -0.61194700 | 1.69335500  | -3.12926600 |
| H  | -1.11832800 | 0.38981500  | -2.05376900 |
| C  | -3.21384300 | 2.96635300  | -2.54092300 |
| H  | -3.71301300 | 2.03722700  | -2.83908500 |
| H  | -2.74006200 | 3.38206700  | -3.43824200 |
| H  | -3.98343500 | 3.67184700  | -2.21207900 |
| C  | -1.02617100 | 4.22833800  | -0.81229200 |
| H  | -6.15844600 | -3.46979400 | -1.13945300 |
| H  | 0.89793000  | 2.54140900  | 0.28223600  |
| H  | 0.23771100  | 4.37420300  | 1.64590000  |
| Y  | 2.70469600  | -1.09953800 | 0.03363000  |
| B  | 5.91144300  | -0.79442000 | -1.65031600 |
| N  | 5.33622200  | 0.60086800  | -1.34001300 |
| N  | 4.08279000  | 0.75352400  | -0.85651100 |

|    |             |             |             |
|----|-------------|-------------|-------------|
| N  | 4.93604200  | -1.53717100 | -2.57894600 |
| N  | 3.66151700  | -1.80351300 | -2.20731100 |
| N  | 6.08244700  | -1.59391700 | -0.34251900 |
| N  | 5.02419500  | -1.94140600 | 0.42211600  |
| N  | 2.40896400  | 0.05163500  | 1.96447500  |
| Si | 3.45711100  | 0.97533200  | 2.96485400  |
| Si | 0.72116700  | -0.20151000 | 2.27432000  |
| Si | -0.72205400 | 5.29025300  | -2.32334200 |
| C  | 5.92754000  | 1.80463900  | -1.48012000 |
| C  | 5.02519200  | 2.78220600  | -1.07836500 |
| H  | 5.17297900  | 3.85192000  | -1.06898300 |
| C  | 3.88412500  | 2.06669100  | -0.69389600 |
| C  | 5.16372600  | -1.99022500 | -3.82911400 |
| C  | 3.99597000  | -2.57528200 | -4.29746500 |
| H  | 3.83151500  | -3.03821800 | -5.25953100 |
| C  | 3.08594000  | -2.43209800 | -3.24064600 |
| C  | 7.22277700  | -2.05838200 | 0.20654100  |
| C  | 6.89941100  | -2.73795600 | 1.37390500  |
| H  | 7.57484900  | -3.23301000 | 2.05606400  |
| C  | 5.50541300  | -2.63218700 | 1.46334500  |
| C  | 5.27405100  | 0.76579600  | 2.48579300  |
| H  | 5.62280700  | -0.26031700 | 2.63875700  |
| H  | 5.89758300  | 1.42763800  | 3.10020000  |
| H  | 5.44478500  | 1.02618800  | 1.43602900  |
| C  | 3.11561700  | 2.83581200  | 2.87595700  |
| H  | 3.34669100  | 3.21841300  | 1.87665500  |
| H  | 3.74040100  | 3.38486500  | 3.59174900  |
| H  | 2.06932000  | 3.07150800  | 3.09401300  |
| C  | 3.31343100  | 0.48111800  | 4.78913200  |
| H  | 2.30417000  | 0.66513600  | 5.17552100  |
| H  | 4.01547200  | 1.04815800  | 5.41305700  |
| H  | 3.53159100  | -0.58495300 | 4.92470800  |
| C  | -0.15017600 | 1.27686900  | 3.04897000  |
| H  | 0.28562500  | 1.52852600  | 4.02337200  |
| H  | -1.20842100 | 1.03745400  | 3.20550100  |
| H  | -0.09602100 | 2.16119300  | 2.41288100  |
| C  | 0.45587200  | -1.61587500 | 3.50708800  |
| H  | 0.84127500  | -2.56382100 | 3.11335200  |
| H  | -0.59982100 | -1.76004800 | 3.76221700  |
| H  | 0.99703400  | -1.39383000 | 4.43444900  |
| C  | 0.03759600  | -0.74073700 | 0.62347100  |
| H  | 0.38178100  | -0.20845500 | -0.26996200 |
| H  | 6.97938300  | -0.67730500 | -2.18429000 |
| S  | 0.88601500  | -3.17027200 | -0.50142700 |
| C  | -0.24514700 | -2.15874400 | 0.41609600  |
| N  | -1.35957500 | -2.60115300 | 0.93917100  |
| H  | -1.72706300 | 4.80880900  | -0.19378800 |



|   |             |             |             |
|---|-------------|-------------|-------------|
| H | -0.00901300 | 6.54843900  | -1.94106500 |
| H | -2.02401600 | 5.74555300  | -2.89865100 |
| H | -5.05775500 | 1.83616900  | -0.94471200 |
| H | -7.65020500 | -1.49171300 | -1.86750500 |
| H | -6.28696600 | -4.53598500 | 1.17890700  |
| H | -3.68144100 | -1.92250200 | 3.42695800  |
| H | -4.58998900 | -4.69919700 | -2.73330500 |
| H | -1.06865500 | -2.20564500 | -2.51111900 |
| H | 4.83139700  | -3.00858400 | 2.22182100  |
| H | 8.17588600  | -1.88061200 | -0.27109800 |
| H | 6.13254500  | -1.86648800 | -4.29214900 |
| H | 2.05443900  | -2.75006200 | -3.16680100 |
| H | 6.93688700  | 1.88141400  | -1.85887600 |
| H | 2.93881800  | 2.41677500  | -0.30862300 |
| C | 2.01696500  | 4.96906900  | -0.33612800 |
| H | 1.80805100  | 6.04332000  | -0.31512800 |
| H | 2.86383100  | 4.78192200  | 0.33238800  |
| H | 2.32448300  | 4.70471000  | -1.35286300 |
| C | 0.27292600  | 4.42264100  | -3.66318000 |
| H | -0.33934000 | 3.68514900  | -4.19050200 |
| H | 0.64241300  | 5.14313200  | -4.40058100 |
| H | 1.13619400  | 3.90122400  | -3.23676700 |
| C | -1.69708600 | -4.00312600 | 0.86444500  |
| H | -2.62962200 | -4.18103000 | 1.40604900  |
| H | -1.83121500 | -4.33366500 | -0.17433600 |
| H | -0.91368000 | -4.63330400 | 1.30638200  |

#### Int-5

|    |             |             |             |
|----|-------------|-------------|-------------|
| Y  | -2.48814100 | -0.18464000 | 0.18044200  |
| B  | -5.36308000 | 0.62394600  | 2.07934800  |
| N  | -5.72381500 | -0.62494900 | 1.25819800  |
| N  | -4.78032300 | -1.20070900 | 0.42336000  |
| N  | -4.16612200 | 0.25770700  | 3.01826000  |
| N  | -2.97295200 | -0.30807900 | 2.57704400  |
| N  | -5.01188200 | 1.77845400  | 1.09361100  |
| N  | -4.10880900 | 1.65190400  | 0.04040900  |
| N  | -2.24719100 | -2.10517400 | -1.09436200 |
| Si | -2.72744200 | -1.91332200 | -2.76820400 |
| Si | -1.63950400 | -3.57019100 | -0.35353000 |
| Si | 1.49539500  | -3.68392500 | -1.30272600 |
| C  | -6.85679200 | -1.34223400 | 1.21826600  |
| C  | -6.67927500 | -2.40087400 | 0.35887300  |
| H  | -7.38094500 | -3.15839000 | 0.10389700  |
| C  | -5.36531200 | -2.26580100 | -0.10621300 |
| C  | -4.13369200 | 0.34409400  | 4.35694900  |
| C  | -2.93368500 | -0.14811900 | 4.81646400  |
| H  | -2.59835300 | -0.21473900 | 5.82338000  |

|    |             |             |             |
|----|-------------|-------------|-------------|
| C  | -2.24454100 | -0.53572300 | 3.66459800  |
| C  | -5.58946800 | 2.99076800  | 1.02400800  |
| C  | -5.08095000 | 3.67590500  | -0.05360500 |
| H  | -5.32395500 | 4.65478300  | -0.38947700 |
| C  | -4.16061300 | 2.79582600  | -0.63092900 |
| C  | -3.22101800 | -0.06467700 | -3.00959900 |
| H  | -4.08045400 | 0.21027900  | -2.40129600 |
| H  | -3.51241100 | 0.09823800  | -4.04420700 |
| H  | -2.40853100 | 0.62879400  | -2.81047900 |
| C  | -4.26985900 | -2.90962600 | -3.35595100 |
| H  | -4.21952500 | -3.95615700 | -3.06542000 |
| H  | -4.30710500 | -2.87798700 | -4.44260900 |
| H  | -5.20197000 | -2.49736400 | -2.98559100 |
| C  | -1.40894800 | -2.38040100 | -4.09060600 |
| H  | -0.39619700 | -2.19660100 | -3.75896900 |
| H  | -1.57437800 | -1.80290000 | -4.99715600 |
| H  | -1.49757200 | -3.43048200 | -4.35717200 |
| C  | -0.97284000 | -3.16223500 | 1.40655800  |
| H  | -0.32172400 | -2.29300400 | 1.41856900  |
| H  | -0.40608500 | -4.00070400 | 1.80142000  |
| H  | -1.79901200 | -2.98222700 | 2.08922100  |
| C  | -3.02206300 | -4.87250500 | -0.02341600 |
| H  | -3.77268900 | -4.45707100 | 0.64103100  |
| H  | -2.62819600 | -5.76418700 | 0.45360100  |
| H  | -3.51892100 | -5.18758000 | -0.93677800 |
| C  | -0.24885300 | -4.47226500 | -1.35939000 |
| H  | -6.28327800 | 0.97142400  | 2.76368500  |
| H  | 2.28393400  | -4.29570900 | -0.19049100 |
| H  | 1.45035800  | -2.22255500 | -1.02536800 |
| Y  | 2.90759100  | 0.61997000  | 0.52896300  |
| B  | 5.92275200  | -1.09795900 | 1.12092800  |
| N  | 5.66531700  | -1.02218000 | -0.40776900 |
| N  | 4.51841200  | -0.43937300 | -0.92186200 |
| N  | 4.77634000  | -1.88978400 | 1.80229000  |
| N  | 3.45040700  | -1.47613000 | 1.73742400  |
| N  | 5.97577300  | 0.34765700  | 1.73231900  |
| N  | 4.90752000  | 1.23820700  | 1.69899100  |
| N  | 2.30679600  | 1.96103200  | -1.10039500 |
| Si | 3.18355400  | 3.29917000  | -1.80656600 |
| Si | 0.67284400  | 1.42102400  | -1.52973200 |
| Si | -0.12128800 | -6.36475400 | -1.08079200 |
| C  | 6.42122600  | -1.46626700 | -1.42163400 |
| C  | 5.78708400  | -1.18527900 | -2.61305000 |
| H  | 6.12509700  | -1.40653300 | -3.59683900 |
| C  | 4.60418200  | -0.53867200 | -2.24421700 |
| C  | 4.85958800  | -2.96397000 | 2.60414500  |
| C  | 3.60538800  | -3.27224100 | 3.07591100  |

|   |             |             |             |
|---|-------------|-------------|-------------|
| H | 3.33274400  | -4.06585800 | 3.72907300  |
| C | 2.76493900  | -2.30794000 | 2.50959500  |
| C | 6.96825500  | 0.89626500  | 2.44540800  |
| C | 6.57855300  | 2.14160500  | 2.89116800  |
| H | 7.13930400  | 2.82543600  | 3.48153500  |
| C | 5.28328100  | 2.30348800  | 2.40132300  |
| C | 5.06568400  | 3.20667300  | -1.43243900 |
| H | 5.28190300  | 3.23296700  | -0.36934500 |
| H | 5.56447500  | 4.05798900  | -1.88948100 |
| H | 5.51225500  | 2.30333000  | -1.83510300 |
| C | 3.03163000  | 3.40641400  | -3.72043000 |
| H | 3.44402100  | 2.51972900  | -4.19497400 |
| H | 3.58474800  | 4.26657500  | -4.08943900 |
| H | 2.00187000  | 3.51136000  | -4.04949800 |
| C | 2.60580700  | 5.00210100  | -1.11414100 |
| H | 1.56571000  | 5.19703700  | -1.35664900 |
| H | 3.20671800  | 5.80724800  | -1.52977300 |
| H | 2.71030800  | 5.02687800  | -0.03137400 |
| C | 0.73640200  | 0.41611300  | -3.15925100 |
| H | 1.20911000  | 1.00669400  | -3.93911500 |
| H | -0.25128000 | 0.14189400  | -3.50517800 |
| H | 1.30905900  | -0.49878600 | -3.04044400 |
| C | -0.51017100 | 2.89544600  | -1.83011700 |
| H | -0.77097500 | 3.38457200  | -0.89976200 |
| H | -1.42809400 | 2.57574000  | -2.31143500 |
| H | -0.04823900 | 3.62672100  | -2.48685200 |
| C | 0.12841900  | 0.33536700  | -0.05508800 |
| H | 0.58778500  | -0.64009800 | 0.08059900  |
| H | 6.97055100  | -1.63807400 | 1.32879000  |
| S | 1.07322000  | 1.20063000  | 2.55082100  |
| C | -0.14763600 | 1.10007800  | 1.17678800  |
| N | -1.29510400 | 1.68097800  | 1.21122700  |
| H | -0.55749400 | -4.37946700 | -2.40274500 |
| H | 1.00570100  | -6.90610600 | -1.90653100 |
| H | -1.35751400 | -7.05179700 | -1.55641900 |
| H | -4.83481700 | -2.88717800 | -0.77841100 |
| H | -7.70619400 | -1.06202100 | 1.79636200  |
| H | -6.32793300 | 3.28395600  | 1.73300800  |
| H | -3.55259700 | 2.96651800  | -1.48730700 |
| H | -4.95975500 | 0.74200100  | 4.89822000  |
| H | -1.26127100 | -0.93726200 | 3.59368300  |
| H | 4.62353400  | 3.13113300  | 2.53119700  |
| H | 7.88384700  | 0.37520000  | 2.59986700  |
| H | 5.79518300  | -3.43636900 | 2.79272700  |
| H | 1.71670100  | -2.18649600 | 2.64345600  |
| H | 7.35298900  | -1.94941700 | -1.24207400 |
| H | 3.83629700  | -0.14443900 | -2.86760100 |

|   |             |             |             |
|---|-------------|-------------|-------------|
| C | 2.45447300  | -3.95089100 | -2.94148100 |
| H | 1.93239600  | -3.49014200 | -3.77463000 |
| H | 3.44557600  | -3.51286500 | -2.87710600 |
| H | 2.56216200  | -5.00925600 | -3.15559800 |
| C | 0.22440700  | -6.88296100 | 0.73484100  |
| H | -0.59248300 | -6.61433800 | 1.39548200  |
| H | 0.36066500  | -7.95880100 | 0.78908100  |
| H | 1.12982700  | -6.41047300 | 1.10236900  |
| C | -1.65991200 | 2.62711000  | 2.27559900  |
| H | -2.63348200 | 3.02954600  | 2.04772700  |
| H | -1.68560800 | 2.14370100  | 3.24278100  |
| H | -0.93725300 | 3.43216500  | 2.33243500  |
| N | -1.36980200 | 6.44947300  | -0.20309200 |
| S | -3.28921200 | 6.44028300  | -2.27366000 |
| C | -2.14927100 | 6.44220600  | -1.04664100 |
| C | -0.39509100 | 6.44963200  | 0.85510900  |
| H | 0.48693500  | 6.97503800  | 0.52216500  |
| H | -0.81547500 | 6.94035700  | 1.72054100  |
| H | -0.13882600 | 5.42995300  | 1.09766900  |

### TS-3

|    |             |             |             |
|----|-------------|-------------|-------------|
| Y  | 3.69056100  | 0.18316800  | -0.07988700 |
| Y  | -2.35554100 | -0.57593700 | -0.12111600 |
| B  | 6.53695000  | -2.02313000 | -0.11156500 |
| B  | -3.41456200 | -3.96311100 | -0.20477200 |
| N  | 6.67818800  | -1.00025500 | 1.05690500  |
| N  | 5.71015400  | -0.04533600 | 1.32358200  |
| N  | 6.41704600  | -1.27636500 | -1.46205700 |
| N  | 5.36178900  | -0.41956900 | -1.73883400 |
| N  | 5.26091500  | -2.88510000 | 0.12307800  |
| N  | 3.99316300  | -2.33064300 | 0.22669000  |
| N  | -3.53442500 | -3.39380100 | 1.24292800  |
| N  | -3.09083000 | -2.12725200 | 1.60195400  |
| N  | -1.93719900 | -3.94262800 | -0.64703000 |
| N  | -1.26321000 | -2.73982500 | -0.78141900 |
| N  | -4.23267600 | -3.09429700 | -1.21821300 |
| N  | -3.95146000 | -1.75891400 | -1.48692200 |
| N  | 3.88721600  | 2.37897300  | -0.07369100 |
| N  | 2.61180200  | -0.48540500 | 2.20868400  |
| N  | -0.55780500 | 0.21058200  | -1.37120300 |
| Si | 5.25041200  | 3.47574600  | -0.14308900 |
| Si | 2.18866500  | 2.83025900  | -0.15803800 |
| S  | -0.15317000 | -1.01918800 | 2.15089800  |
| S  | 2.00683600  | 0.10563500  | -2.38858200 |
| C  | 7.69179300  | -0.85136100 | 1.92300100  |
| C  | 7.40784400  | 0.19533000  | 2.77304200  |
| H  | 8.00995200  | 0.57243100  | 3.56459800  |

|   |             |             |             |
|---|-------------|-------------|-------------|
| C | 6.16170600  | 0.66592200  | 2.35049900  |
| C | 7.19402800  | -1.37600600 | -2.55409700 |
| C | 6.66603200  | -0.59466200 | -3.55461800 |
| H | 7.04220700  | -0.45711300 | -4.53973200 |
| C | 5.51884800  | -0.02097500 | -2.99283100 |
| C | 5.16954100  | -4.21991000 | 0.23537000  |
| C | 3.85051100  | -4.56608000 | 0.41764100  |
| H | 3.44235400  | -5.54068800 | 0.53871600  |
| C | 3.16000600  | -3.34934900 | 0.40343500  |
| C | -4.00701500 | -4.01248500 | 2.33490900  |
| C | -3.88402900 | -3.17451400 | 3.42125600  |
| H | -4.16724500 | -3.36841900 | 4.42770300  |
| C | -3.30832300 | -2.01111300 | 2.90898800  |
| C | -1.13880000 | -4.94645000 | -1.04692100 |
| C | 0.06638800  | -4.42090600 | -1.44817900 |
| H | 0.91325500  | -4.94138800 | -1.82666800 |
| C | -0.06582500 | -3.03663900 | -1.26674100 |
| C | -5.20007100 | -3.50577800 | -2.04912200 |
| C | -5.56915400 | -2.46428200 | -2.87273200 |
| H | -6.30877200 | -2.46790600 | -3.63665000 |
| C | -4.75919500 | -1.39915000 | -2.47998500 |
| C | 6.85604300  | 2.66328900  | -0.81025600 |
| H | 6.78476800  | 2.48595900  | -1.87877300 |
| H | 7.69489900  | 3.33430100  | -0.63908800 |
| H | 7.07808400  | 1.71624200  | -0.33399000 |
| C | 4.95823900  | 5.00070000  | -1.28210700 |
| H | 4.19264500  | 5.66633200  | -0.89340200 |
| H | 5.88161400  | 5.57053100  | -1.35767900 |
| H | 4.66571200  | 4.70129300  | -2.28374500 |
| C | 5.69133200  | 4.25028100  | 1.57140500  |
| H | 6.28397900  | 5.15015200  | 1.42369500  |
| H | 4.79611500  | 4.52821100  | 2.12095900  |
| H | 6.27562900  | 3.57732700  | 2.19069800  |
| C | 1.68903000  | 3.77699200  | -1.74570600 |
| H | 2.03851000  | 3.25169400  | -2.62718000 |
| H | 0.61014300  | 3.86494700  | -1.81061900 |
| H | 2.10728900  | 4.77791700  | -1.75340200 |
| C | 1.64195300  | 3.89263500  | 1.34319400  |
| H | 2.22731100  | 4.80678700  | 1.40211900  |
| H | 0.59632800  | 4.17086100  | 1.26356700  |
| H | 1.77823000  | 3.35158400  | 2.27620100  |
| C | 1.19754400  | 1.16604800  | 0.02259000  |
| H | 0.40704600  | 1.37018900  | 0.73164300  |
| C | 1.43932500  | -0.54683600 | 2.01929000  |
| C | 0.70666600  | 0.54312200  | -1.16611800 |
| H | -3.84492500 | -5.08032500 | -0.21735400 |
| H | 7.49951700  | -2.73700200 | -0.12701600 |

|    |             |             |             |
|----|-------------|-------------|-------------|
| N  | -3.73908400 | 1.07775400  | 0.56344400  |
| Si | -3.00489900 | 2.66915000  | 0.90502100  |
| Si | -5.43558100 | 0.84454700  | 1.04067100  |
| Si | -6.34901900 | 2.40402900  | -1.67140600 |
| C  | -1.92207400 | 2.57770900  | 2.49333700  |
| H  | -2.53656000 | 2.29196400  | 3.34380100  |
| H  | -1.48437100 | 3.54807900  | 2.71055700  |
| H  | -1.11281900 | 1.86039800  | 2.42119400  |
| C  | -4.20274600 | 4.13483700  | 1.25697400  |
| H  | -4.76146800 | 4.42176000  | 0.37327100  |
| H  | -3.58405800 | 4.98492600  | 1.53707900  |
| H  | -4.90065000 | 3.96187100  | 2.06782100  |
| C  | -1.96259800 | 3.30472400  | -0.56516900 |
| H  | -1.21277200 | 2.60067400  | -0.89591700 |
| H  | -1.46457600 | 4.23081200  | -0.29093800 |
| H  | -2.61546300 | 3.51711600  | -1.40740200 |
| C  | -6.16690400 | -0.89763700 | 0.71738300  |
| H  | -6.40342900 | -1.05704500 | -0.32684800 |
| H  | -7.09081900 | -0.97820900 | 1.28570700  |
| H  | -5.52083100 | -1.69912800 | 1.03985000  |
| C  | -5.64116700 | 1.11172300  | 2.93896000  |
| H  | -5.23817900 | 0.25737600  | 3.47635800  |
| H  | -6.68789400 | 1.20303700  | 3.21159300  |
| H  | -5.12410800 | 1.99731000  | 3.29198300  |
| C  | -6.68210800 | 2.06004300  | 0.17739100  |
| Si | -8.53315800 | 1.66496900  | 0.49302500  |
| H  | -6.54026700 | 3.02284500  | 0.66833200  |
| C  | -7.50539100 | 3.75264500  | -2.39969000 |
| H  | -7.37544900 | 4.69281000  | -1.87200600 |
| H  | -7.27377900 | 3.92028400  | -3.44718700 |
| H  | -8.55104800 | 3.47192900  | -2.32555900 |
| H  | -6.54283100 | 1.15661500  | -2.47396600 |
| H  | -4.94525600 | 2.84118300  | -1.90892000 |
| H  | -9.30624200 | 2.94593000  | 0.46561700  |
| H  | -8.74245500 | 1.07619300  | 1.84903800  |
| H  | -4.39706900 | -5.00152200 | 2.27777000  |
| H  | -3.05400700 | -1.11491000 | 3.42622000  |
| H  | -1.47470700 | -5.95696900 | -1.02888300 |
| H  | 0.64405800  | -2.27452700 | -1.48984700 |
| H  | 6.03676800  | -4.83518900 | 0.17940100  |
| H  | 2.11114600  | -3.19582800 | 0.50620100  |
| H  | 8.54531100  | -1.48675100 | 1.88317000  |
| H  | 5.59410200  | 1.48041000  | 2.73469700  |
| H  | 8.06173400  | -1.99339900 | -2.55543000 |
| H  | 4.81611600  | 0.64202200  | -3.44150800 |
| H  | -4.74879700 | -0.40522500 | -2.86228000 |
| H  | -5.56295500 | -4.50611000 | -2.01299700 |

|   |              |             |             |
|---|--------------|-------------|-------------|
| C | 3.42581100   | -1.07459000 | 3.32866700  |
| H | 3.85507800   | -0.25759100 | 3.88115900  |
| H | 2.78542400   | -1.67303600 | 3.95894300  |
| H | 4.19824300   | -1.66724000 | 2.87646800  |
| C | -0.95470100  | -0.13728000 | -2.76949500 |
| H | -0.41739600  | -0.98571000 | -3.16276300 |
| H | -2.01585600  | -0.37238800 | -2.79190300 |
| H | -0.78992800  | 0.70811700  | -3.42348300 |
| C | -9.34026200  | 0.48248300  | -0.78713700 |
| H | -8.84421700  | -0.48141200 | -0.80190100 |
| H | -10.38268600 | 0.32370200  | -0.52740700 |
| H | -9.30468000  | 0.89485400  | -1.79035500 |

**Int-6**

|    |             |             |             |
|----|-------------|-------------|-------------|
| Y  | -4.28278100 | -0.09290000 | 0.40962000  |
| Y  | 2.29836200  | 0.36697400  | 0.12999400  |
| B  | -6.84779500 | 1.74857600  | -1.46803800 |
| B  | 3.35635400  | 3.77019100  | 0.80188800  |
| N  | -7.45731200 | 1.26657700  | -0.13672200 |
| N  | -6.72734100 | 0.56281200  | 0.75517900  |
| N  | -6.35507100 | 0.52828400  | -2.26732300 |
| N  | -5.39715500 | -0.30078800 | -1.79406100 |
| N  | -5.67089300 | 2.69174200  | -1.16271300 |
| N  | -4.63083700 | 2.28890400  | -0.40090400 |
| N  | 3.67929300  | 2.85218300  | 1.99465500  |
| N  | 3.29963000  | 1.55647400  | 2.00844000  |
| N  | 1.83760900  | 3.77551700  | 0.56050300  |
| N  | 1.17644600  | 2.65702400  | 0.17933200  |
| N  | 4.04008500  | 3.23902700  | -0.47185300 |
| N  | 3.72658000  | 2.02575900  | -0.97180200 |
| N  | -3.62571300 | -2.28525000 | 0.43503500  |
| N  | -2.26641000 | 0.29667000  | 1.75096000  |
| N  | 0.36478500  | 0.11215400  | -1.38591600 |
| Si | -4.68828200 | -3.58645800 | 0.84445100  |
| Si | -1.95708800 | -2.60757300 | 0.21438300  |
| S  | 0.35058500  | 0.33263900  | 2.40490100  |
| S  | -2.31218100 | 0.30109000  | -1.62544500 |
| C  | -8.70333000 | 1.47052500  | 0.33760200  |
| C  | -8.79430200 | 0.87654200  | 1.58916700  |
| H  | -9.65180400 | 0.85183700  | 2.24565100  |
| C  | -7.52536600 | 0.32038000  | 1.80274800  |
| C  | -6.79760800 | 0.09119100  | -3.46404900 |
| C  | -6.10410100 | -1.06795900 | -3.78641100 |
| H  | -6.21097700 | -1.67292300 | -4.67485200 |
| C  | -5.23689900 | -1.26916900 | -2.70445800 |
| C  | -5.52565100 | 3.99058800  | -1.50053300 |
| C  | -4.34451100 | 4.45481900  | -0.93698200 |

|    |             |             |             |
|----|-------------|-------------|-------------|
| H  | -3.92669000 | 5.44834300  | -1.00942800 |
| C  | -3.82335700 | 3.34494300  | -0.25672700 |
| C  | 4.35347100  | 3.14941500  | 3.12428100  |
| C  | 4.41040300  | 2.00414400  | 3.90900100  |
| H  | 4.87500900  | 1.89309900  | 4.87767900  |
| C  | 3.73295000  | 1.03203100  | 3.16093000  |
| C  | 0.98280300  | 4.81369800  | 0.66799000  |
| C  | -0.28790200 | 4.35949400  | 0.34323400  |
| H  | -1.20371800 | 4.93170700  | 0.31769100  |
| C  | -0.11003700 | 3.00003400  | 0.04599100  |
| C  | 4.87847500  | 3.88126400  | -1.30904200 |
| C  | 5.11745000  | 3.05731400  | -2.40258000 |
| H  | 5.74517000  | 3.26266500  | -3.25706500 |
| C  | 4.36438700  | 1.90470400  | -2.14183200 |
| C  | -6.46120300 | -3.12526300 | 0.37815100  |
| H  | -6.55950900 | -2.97411100 | -0.70282600 |
| H  | -7.15878900 | -3.91898300 | 0.67269400  |
| H  | -6.78353400 | -2.20226800 | 0.87288200  |
| C  | -4.29574400 | -5.20321500 | -0.05413600 |
| H  | -3.30203600 | -5.59130200 | 0.19356300  |
| H  | -5.02832000 | -5.97320900 | 0.21783800  |
| H  | -4.34222000 | -5.06738000 | -1.14058500 |
| C  | -4.68395200 | -3.93830200 | 2.70343400  |
| H  | -4.96181600 | -3.03384200 | 3.25892700  |
| H  | -5.39647600 | -4.72852100 | 2.97028000  |
| H  | -3.69210900 | -4.24792900 | 3.05079300  |
| C  | -1.54950000 | -3.34813900 | -1.47159900 |
| H  | -1.99430600 | -2.73662500 | -2.26347300 |
| H  | -0.46810800 | -3.39417300 | -1.64126600 |
| H  | -1.94844800 | -4.36413700 | -1.55933900 |
| C  | -1.18741700 | -3.69744900 | 1.55405000  |
| H  | -1.67920600 | -4.67211200 | 1.63640300  |
| H  | -0.12760800 | -3.87561200 | 1.33555400  |
| H  | -1.24929900 | -3.20496000 | 2.53162400  |
| C  | -0.84502300 | -1.03884700 | 0.32693500  |
| H  | 0.14658800  | -1.49064500 | 0.44108000  |
| C  | -1.06136000 | -0.13659700 | 1.51910300  |
| C  | -0.81826400 | -0.20350100 | -0.92897100 |
| H  | 3.74215200  | 4.88151900  | 1.03652800  |
| H  | -7.68064100 | 2.33321400  | -2.10424100 |
| N  | 4.10034300  | -1.12209200 | 0.27978000  |
| Si | 3.60706600  | -2.78414200 | 0.43697500  |
| Si | 5.77090900  | -0.80135300 | 0.58401900  |
| Si | 6.20589200  | -1.72381900 | -2.41586100 |
| C  | 2.82460200  | -3.04257100 | 2.14322100  |
| H  | 3.55716700  | -2.85286100 | 2.93734400  |
| H  | 2.43494800  | -4.05905700 | 2.27808700  |



|    |             |             |             |
|----|-------------|-------------|-------------|
| H  | 1.99529900  | -2.33747800 | 2.28649000  |
| C  | 4.88344100  | -4.16255900 | 0.21697300  |
| H  | 5.28291800  | -4.20092900 | -0.80075500 |
| H  | 4.36385600  | -5.11217700 | 0.40032300  |
| H  | 5.72207600  | -4.10984200 | 0.91708200  |
| C  | 2.25903200  | -3.13763000 | -0.84273400 |
| H  | 1.50903900  | -2.33902300 | -0.86322000 |
| H  | 1.73930900  | -4.07956300 | -0.63254800 |
| H  | 2.68874400  | -3.20344700 | -1.84941600 |
| C  | 6.27153900  | 1.01561900  | 0.57826700  |
| H  | 6.19322800  | 1.47693500  | -0.40794300 |
| H  | 7.31733200  | 1.08611100  | 0.90227900  |
| H  | 5.67517000  | 1.60299700  | 1.27793500  |
| C  | 6.32633300  | -1.43998900 | 2.28143700  |
| H  | 5.81315400  | -0.88849800 | 3.07726200  |
| H  | 7.40476800  | -1.29432700 | 2.41780900  |
| H  | 6.11361500  | -2.50481200 | 2.42138800  |
| C  | 6.91074100  | -1.66940000 | -0.68594500 |
| Si | 8.65628200  | -0.99618900 | -0.72507100 |
| H  | 6.99592400  | -2.71531900 | -0.36062100 |
| C  | 7.32455500  | -2.65771100 | -3.61189900 |
| H  | 7.50117600  | -3.67764000 | -3.25221100 |
| H  | 6.86802800  | -2.72553800 | -4.60557800 |
| H  | 8.29842800  | -2.16917300 | -3.72225100 |
| H  | 6.01836800  | -0.33541000 | -2.92551100 |
| H  | 4.86368400  | -2.37080200 | -2.44864600 |
| H  | 9.60124100  | -2.05968700 | -1.19328000 |
| H  | 9.12176200  | -0.63432200 | 0.64941600  |
| H  | 4.73794300  | 4.14572400  | 3.29013000  |
| H  | 3.54294000  | -0.00838700 | 3.38649800  |
| H  | 1.33760600  | 5.79264700  | 0.95775800  |
| H  | -0.84426400 | 2.26572200  | -0.25712700 |
| H  | -6.26789400 | 4.48888000  | -2.10794000 |
| H  | -2.91926200 | 3.25529900  | 0.32758000  |
| H  | -9.43103600 | 2.01975400  | -0.24286200 |
| H  | -7.15227800 | -0.23788600 | 2.65171200  |
| H  | -7.56675300 | 0.63172600  | -3.99723600 |
| H  | -4.50713900 | -2.04954800 | -2.53744600 |
| H  | 4.26246100  | 1.00020500  | -2.72397900 |
| H  | 5.23733600  | 4.87347300  | -1.07511900 |
| C  | -2.47407900 | 1.29892000  | 2.78086500  |
| H  | -2.25323900 | 0.90750200  | 3.78187300  |
| H  | -1.83352300 | 2.17586800  | 2.62281300  |
| H  | -3.52180400 | 1.61832000  | 2.76397600  |
| C  | 0.46102100  | 0.90596600  | -2.59952500 |
| H  | -0.09983800 | 1.84551000  | -2.52146400 |
| H  | 1.51217800  | 1.13933500  | -2.79236700 |

|   |            |            |             |
|---|------------|------------|-------------|
| H | 0.06443500 | 0.35815400 | -3.46371400 |
| C | 8.86218300 | 0.49546500 | -1.85502200 |
| H | 8.13784300 | 1.27979000 | -1.61663500 |
| H | 9.86824200 | 0.91708100 | -1.75579700 |
| H | 8.72072300 | 0.21462900 | -2.90397900 |

7

|    |             |             |             |
|----|-------------|-------------|-------------|
| Y  | -2.91692700 | 0.27606600  | 0.61345900  |
| Y  | 3.55344600  | -0.03860100 | -0.61081800 |
| B  | -5.90570600 | 2.02250600  | -0.57566300 |
| B  | 6.81007400  | 0.84414200  | 0.71328000  |
| N  | -6.19327400 | 1.37094600  | 0.79158200  |
| N  | -5.22460300 | 0.72940600  | 1.47917200  |
| N  | -5.49257100 | 0.93291200  | -1.57970400 |
| N  | -4.39491500 | 0.16923900  | -1.37986900 |
| N  | -4.75823500 | 3.03525500  | -0.41701000 |
| N  | -3.53368700 | 2.65544000  | 0.01266000  |
| N  | 6.24171000  | -0.34747500 | 1.50003900  |
| N  | 5.03546200  | -0.88692400 | 1.20300200  |
| N  | 5.84879600  | 2.03925600  | 0.84816600  |
| N  | 4.55831400  | 1.94294200  | 0.45992200  |
| N  | 6.92516100  | 0.44628000  | -0.77084600 |
| N  | 5.84516400  | 0.03181100  | -1.46969800 |
| N  | -2.57086500 | -1.91323500 | 0.12122700  |
| N  | -0.70292900 | 0.26486300  | 1.73394000  |
| N  | 1.43313300  | 0.54485800  | -1.68851300 |
| Si | -3.70583000 | -3.19584400 | 0.36137300  |
| Si | -0.97613900 | -2.29826900 | -0.36695200 |
| S  | 1.99996100  | 0.03167700  | 1.80049900  |
| S  | -1.22661100 | 0.99844600  | -1.58404500 |
| C  | -7.35635900 | 1.32250800  | 1.47103500  |
| C  | -7.14206700 | 0.62218600  | 2.65123200  |
| H  | -7.86134200 | 0.40245400  | 3.42646800  |
| C  | -5.78649500 | 0.27153200  | 2.60613100  |
| C  | -6.10860000 | 0.57325700  | -2.72466000 |
| C  | -5.38333700 | -0.46421600 | -3.29686400 |
| H  | -5.59949800 | -0.98776100 | -4.21682900 |
| C  | -4.31847500 | -0.67907900 | -2.41069300 |
| C  | -4.77807900 | 4.36222900  | -0.65925300 |
| C  | -3.51891300 | 4.87306400  | -0.37611500 |
| H  | -3.18967900 | 5.89823700  | -0.46252100 |
| C  | -2.77661800 | 3.75860500  | 0.03906500  |
| C  | 6.81442600  | -1.01766700 | 2.51990100  |
| C  | 5.95265100  | -2.03445100 | 2.90761300  |
| H  | 6.10096800  | -2.75855100 | 3.69523300  |
| C  | 4.85297500  | -1.90752500 | 2.04935400  |
| C  | 6.08942000  | 3.26365600  | 1.35640300  |

|    |             |             |             |
|----|-------------|-------------|-------------|
| C  | 4.91232600  | 3.99881700  | 1.29634400  |
| H  | 4.75555800  | 5.01707600  | 1.62048200  |
| C  | 3.98118900  | 3.12236200  | 0.72601400  |
| C  | 8.02066500  | 0.41929000  | -1.55386800 |
| C  | 7.64564200  | -0.02730800 | -2.81468800 |
| H  | 8.27854200  | -0.16706300 | -3.67859500 |
| C  | 6.26905600  | -0.25633800 | -2.70867000 |
| C  | -5.49509300 | -2.60466200 | 0.22750500  |
| H  | -5.73656600 | -2.27007300 | -0.78614700 |
| H  | -6.17143000 | -3.42974200 | 0.48412000  |
| H  | -5.70421300 | -1.77732100 | 0.91287700  |
| C  | -3.52455300 | -4.59841800 | -0.89522100 |
| H  | -2.54271500 | -5.08159400 | -0.85032700 |
| H  | -4.28151700 | -5.37032200 | -0.70899500 |
| H  | -3.67098600 | -4.22785700 | -1.91624000 |
| C  | -3.53328700 | -3.94110300 | 2.09354900  |
| H  | -3.69025600 | -3.16460900 | 2.85292500  |
| H  | -4.26835200 | -4.73589500 | 2.27082700  |
| H  | -2.53515000 | -4.36295300 | 2.25383500  |
| C  | -0.77468800 | -2.73616900 | -2.19069200 |
| H  | -1.18786300 | -1.94060600 | -2.81967100 |
| H  | 0.28853700  | -2.84759900 | -2.43657700 |
| H  | -1.28075600 | -3.67260000 | -2.44484900 |
| C  | -0.16231400 | -3.65247500 | 0.66960500  |
| H  | -0.70231400 | -4.60316100 | 0.61085300  |
| H  | 0.86552100  | -3.82387100 | 0.32802500  |
| H  | -0.12219100 | -3.35273200 | 1.72351100  |
| C  | 0.28165100  | -0.86007300 | -0.15699300 |
| H  | 1.20615500  | -1.42913900 | -0.30923000 |
| C  | 0.38552100  | -0.18266200 | 1.18519600  |
| C  | 0.26382600  | 0.22724300  | -1.19971300 |
| H  | 7.89085800  | 1.14160300  | 1.13850200  |
| H  | -6.89203200 | 2.58195300  | -0.96871200 |
| Cl | 3.33282100  | -2.65311000 | -1.07667500 |
| C  | 1.52905600  | 1.61554800  | -2.66504700 |
| H  | 0.97841900  | 1.37513300  | -3.58260800 |
| H  | 1.12087100  | 2.55580500  | -2.27321200 |
| H  | 2.58002500  | 1.77162000  | -2.92726700 |
| C  | -0.61904600 | 1.02981900  | 2.96484600  |
| H  | -0.22037500 | 0.42631400  | 3.78913400  |
| H  | 0.03384000  | 1.90447700  | 2.85136100  |
| H  | -1.62012400 | 1.37200900  | 3.24447000  |
| H  | 7.07198500  | 3.52386700  | 1.72364700  |
| H  | 2.93422100  | 3.27632300  | 0.50043500  |
| H  | -5.67799300 | 4.84438700  | -1.01399300 |
| H  | -1.74083400 | 3.69612000  | 0.34496800  |
| H  | -8.24645400 | 1.78892600  | 1.07324800  |

|   |             |             |             |
|---|-------------|-------------|-------------|
| H | -5.19447100 | -0.28742000 | 3.31938300  |
| H | -7.00841700 | 1.07696900  | -3.04863100 |
| H | -3.51328800 | -1.39893500 | -2.44603900 |
| H | 3.94579600  | -2.49228500 | 1.99903200  |
| H | 7.78601400  | -0.72613200 | 2.89293800  |
| H | 8.98363300  | 0.71574800  | -1.16299900 |
| H | 5.56828600  | -0.61353500 | -3.45203700 |

**Int-7**

|    |             |             |             |
|----|-------------|-------------|-------------|
| Y  | -2.71453800 | -0.66321000 | -0.33865800 |
| B  | -5.88235200 | 0.58942400  | 0.44846600  |
| N  | -5.40072300 | 1.20853500  | -0.89996400 |
| N  | -4.16531000 | 0.91298900  | -1.46769600 |
| N  | -5.94277700 | -0.96799600 | 0.30402500  |
| N  | -4.82362800 | -1.73782400 | 0.00790100  |
| N  | -4.89626900 | 0.95784700  | 1.58428700  |
| N  | -3.55964200 | 0.58038400  | 1.54380300  |
| C  | -6.08682100 | 1.99188500  | -1.74449200 |
| C  | -5.32753900 | 2.22224200  | -2.87035100 |
| H  | -5.58819500 | 2.80048000  | -3.72360100 |
| C  | -4.14190600 | 1.51909900  | -2.64986100 |
| C  | -7.01133200 | -1.77308300 | 0.37169400  |
| C  | -6.62049500 | -3.07187700 | 0.12402100  |
| H  | -7.23205400 | -3.94131700 | 0.10166200  |
| C  | -5.24619200 | -2.99267300 | -0.10396400 |
| C  | -5.13269400 | 1.59341300  | 2.74090200  |
| C  | -3.96803900 | 1.64517600  | 3.47365400  |
| H  | -3.82096300 | 2.08390600  | 4.43092400  |
| C  | -3.01556700 | 0.99693800  | 2.68353400  |
| H  | -6.97659600 | 1.00124000  | 0.70417100  |
| Y  | 2.48077800  | 0.06325700  | 0.28529100  |
| B  | 4.99346400  | -2.24441100 | -0.46028000 |
| N  | 5.03231000  | -1.09568100 | -1.51038400 |
| N  | 4.12282900  | -0.05048200 | -1.47571000 |
| N  | 3.61471500  | -2.95698000 | -0.54616800 |
| N  | 2.40468000  | -2.28821100 | -0.37149300 |
| N  | 5.21325100  | -1.65908400 | 0.97344400  |
| N  | 4.37072100  | -0.71807000 | 1.55460400  |
| N  | 1.97919100  | 2.15318300  | -0.16714700 |
| Si | 2.98997800  | 3.56095100  | 0.02229900  |
| Si | 0.25413800  | 2.01679900  | -0.45488500 |
| C  | 5.81918700  | -0.95179900 | -2.58588100 |
| C  | 5.44291000  | 0.18312900  | -3.27195900 |
| H  | 5.86789400  | 0.57272100  | -4.16539100 |
| C  | 4.37791800  | 0.70818200  | -2.53641100 |
| C  | 3.35784700  | -4.24190300 | -0.84036900 |
| C  | 1.99695700  | -4.43862200 | -0.86299400 |

|   |             |             |             |
|---|-------------|-------------|-------------|
| H | 1.47240100  | -5.33960100 | -1.07138200 |
| C | 1.44762500  | -3.18773400 | -0.56431300 |
| C | 6.16605700  | -1.98650500 | 1.85743800  |
| C | 5.97108100  | -1.27663600 | 3.02250100  |
| H | 6.55378400  | -1.31280300 | 3.91112300  |
| C | 4.83474700  | -0.50357100 | 2.78081200  |
| C | 4.73908600  | 3.02135300  | 0.61602600  |
| H | 4.70359800  | 2.58689000  | 1.61294600  |
| H | 5.39673900  | 3.88547700  | 0.66534000  |
| H | 5.19748200  | 2.29464800  | -0.04777600 |
| C | 3.22356600  | 4.57118300  | -1.59794100 |
| H | 3.68742400  | 3.97977100  | -2.38204500 |
| H | 3.85772700  | 5.43539100  | -1.41540700 |
| H | 2.27138900  | 4.93389800  | -1.97670300 |
| C | 2.35463600  | 4.80857000  | 1.33797900  |
| H | 1.44674900  | 5.31141400  | 1.01962000  |
| H | 3.10854600  | 5.57012500  | 1.52332200  |
| H | 2.14309500  | 4.30704000  | 2.27834500  |
| C | -0.22519800 | 2.36366200  | -2.28137200 |
| H | 0.21006300  | 3.29924900  | -2.62146500 |
| H | -1.30264300 | 2.44612100  | -2.39257900 |
| H | 0.12697900  | 1.57580700  | -2.94235200 |
| C | -0.83630200 | 3.16049100  | 0.62301200  |
| H | -0.69495400 | 4.20099200  | 0.34384400  |
| H | -0.59445300 | 3.05770500  | 1.67483200  |
| H | -1.88876300 | 2.92450800  | 0.49202000  |
| C | -0.14626000 | 0.16695600  | -0.18882100 |
| H | -0.24776300 | -0.44723700 | -1.08289600 |
| H | 5.86561400  | -3.03106300 | -0.69258200 |
| S | 0.69649400  | -0.05609000 | 2.50524400  |
| C | -0.30606300 | -0.54915000 | 1.05525100  |
| N | -1.17120000 | -1.54203800 | 1.10402800  |
| H | -3.29928100 | 1.42439400  | -3.29502400 |
| H | -7.06603100 | 2.33275100  | -1.50217900 |
| H | -6.10306400 | 1.96495300  | 2.97407200  |
| H | -1.98391800 | 0.82965500  | 2.89346700  |
| H | -7.97866200 | -1.38286500 | 0.58575500  |
| H | -4.56747300 | -3.77549500 | -0.35457200 |
| H | 4.34441400  | 0.17732400  | 3.43839500  |
| H | 6.91798500  | -2.69948700 | 1.61281600  |
| H | 4.14961300  | -4.93144700 | -1.01855600 |
| H | 0.42053000  | -2.91948400 | -0.47890000 |
| H | 6.58860200  | -1.65548000 | -2.80173800 |
| H | 3.80296700  | 1.58442600  | -2.72262400 |
| C | -1.25273800 | -2.43683200 | 2.27030600  |
| H | -1.97020600 | -3.21479600 | 2.04553800  |
| H | -0.29225300 | -2.89100600 | 2.47743200  |

|    |             |             |             |
|----|-------------|-------------|-------------|
| H  | -1.57076000 | -1.90894100 | 3.16124700  |
| Cl | -2.22881700 | -2.08677500 | -2.51362100 |

**Int-8**

|    |             |             |             |
|----|-------------|-------------|-------------|
| Y  | -2.62969100 | -0.30648600 | -0.33940200 |
| Y  | 2.76964400  | 0.48607600  | -0.02823500 |
| B  | -4.95669700 | 2.30722500  | 0.02615100  |
| B  | 5.48560500  | -1.74070800 | -0.23442600 |
| N  | -4.98848100 | 1.41000100  | 1.29588900  |
| N  | -4.15848700 | 0.30844300  | 1.43090500  |
| N  | -5.30095500 | 1.45679600  | -1.23893700 |
| N  | -4.54016800 | 0.37206400  | -1.66024700 |
| N  | -3.53499500 | 2.92313300  | -0.12695200 |
| N  | -2.39001600 | 2.13896800  | -0.20728900 |
| N  | 4.77526000  | -1.91973600 | 1.13499200  |
| N  | 3.68997900  | -1.13432300 | 1.50676800  |
| N  | 5.99120400  | -0.26533700 | -0.34704300 |
| N  | 5.14966000  | 0.84683800  | -0.31873000 |
| N  | 4.49930700  | -2.03124000 | -1.38682400 |
| N  | 3.32580500  | -1.30360200 | -1.54305800 |
| N  | -2.29705500 | -2.31737600 | 0.46418300  |
| N  | 1.47679700  | 4.86811500  | 1.37516900  |
| N  | 1.07236800  | 0.85264300  | -1.49301800 |
| Si | -3.42909300 | -3.63506900 | 0.57586800  |
| Si | -0.54978100 | -2.28562600 | 0.67873700  |
| S  | 3.06091300  | 3.84283300  | -0.73614800 |
| S  | -0.91836800 | -0.76161900 | -2.55242700 |
| C  | -5.71619800 | 1.54539800  | 2.41459900  |
| C  | -5.37734900 | 0.54326800  | 3.29728700  |
| H  | -5.77343100 | 0.37213300  | 4.26916900  |
| C  | -4.39916800 | -0.20226600 | 2.63271700  |
| C  | -6.29095300 | 1.65650300  | -2.12161700 |
| C  | -6.20081400 | 0.71963100  | -3.12715800 |
| H  | -6.83446500 | 0.61140300  | -3.97410300 |
| C  | -5.08789400 | -0.05449100 | -2.79192700 |
| C  | -3.18231700 | 4.21484700  | -0.21637900 |
| C  | -1.81503100 | 4.30064100  | -0.35393600 |
| H  | -1.22714500 | 5.17946700  | -0.47069800 |
| C  | -1.36862900 | 2.97227300  | -0.34297100 |
| C  | 5.13743300  | -2.67958900 | 2.17843600  |
| C  | 4.30836900  | -2.40973900 | 3.24416800  |
| H  | 4.33434500  | -2.84382200 | 4.21448100  |
| C  | 3.42895300  | -1.43012200 | 2.77509100  |
| C  | 7.25887200  | 0.15293900  | -0.43593300 |
| C  | 7.28442700  | 1.53025600  | -0.46655700 |
| H  | 8.13514300  | 2.16454000  | -0.53323500 |
| C  | 5.94701400  | 1.91246800  | -0.38765600 |

|    |             |             |             |
|----|-------------|-------------|-------------|
| C  | 4.57427700  | -2.95314200 | -2.35612800 |
| C  | 3.46082900  | -2.85298300 | -3.15948700 |
| H  | 3.21460300  | -3.44447100 | -4.00795300 |
| C  | 2.71125200  | -1.81181900 | -2.60878600 |
| C  | -5.15358400 | -3.05843200 | -0.05753500 |
| H  | -5.13336300 | -2.84246000 | -1.12345100 |
| H  | -5.88883200 | -3.84375300 | 0.09870300  |
| H  | -5.50608800 | -2.16859300 | 0.45609600  |
| C  | -2.96347700 | -5.16467500 | -0.48961300 |
| H  | -2.08901100 | -5.67861300 | -0.10235700 |
| H  | -3.78708300 | -5.87477000 | -0.50540800 |
| H  | -2.74827800 | -4.87233200 | -1.51364100 |
| C  | -3.68818700 | -4.29663000 | 2.36472300  |
| H  | -4.05713500 | -3.52292800 | 3.03217200  |
| H  | -4.41261500 | -5.10766700 | 2.36440200  |
| H  | -2.76148400 | -4.68077000 | 2.78278100  |
| C  | 0.40959900  | -3.66382000 | -0.23492300 |
| H  | 0.16471400  | -3.67806900 | -1.29062300 |
| H  | 1.47896400  | -3.49826400 | -0.13610300 |
| H  | 0.18286100  | -4.64095900 | 0.18274600  |
| C  | -0.06983600 | -2.40114800 | 2.53340600  |
| H  | -0.65813500 | -3.17016900 | 3.02637800  |
| H  | 0.97698700  | -2.65802300 | 2.65263700  |
| H  | -0.25327600 | -1.46209500 | 3.04985800  |
| C  | -0.03945600 | -0.53136400 | 0.10379700  |
| H  | 0.28547000  | 0.14364600  | 0.88850600  |
| C  | 2.12186200  | 4.45756800  | 0.52675700  |
| C  | 0.16021100  | -0.08193700 | -1.22461900 |
| H  | 6.42511800  | -2.48025300 | -0.30069300 |
| H  | -5.76342700 | 3.18625400  | 0.13303000  |
| Cl | 2.01707000  | 1.72268000  | 2.27052000  |
| C  | 1.10336500  | 1.50217700  | -2.81974100 |
| H  | 1.35929200  | 0.80433400  | -3.60780400 |
| H  | 0.14113000  | 1.93293600  | -3.06551700 |
| H  | 1.83806400  | 2.29220200  | -2.79073600 |
| C  | 0.67912300  | 5.08558900  | 2.56153900  |
| H  | 0.85441000  | 4.24757700  | 3.21898500  |
| H  | 0.98003000  | 6.01337400  | 3.02232700  |
| H  | -0.35958800 | 5.12384600  | 2.27226300  |
| H  | 8.06276000  | -0.54441800 | -0.47063200 |
| H  | 5.54176700  | 2.89512800  | -0.37500400 |
| H  | -3.91476100 | 4.98718000  | -0.18033000 |
| H  | -0.37682200 | 2.59569100  | -0.43991000 |
| H  | -6.42258300 | 2.33545300  | 2.51793900  |
| H  | -3.87636300 | -1.06870600 | 2.96370600  |
| H  | -6.99241600 | 2.44631000  | -1.98813500 |
| H  | -4.67127700 | -0.88033000 | -3.32193800 |

|   |            |             |             |
|---|------------|-------------|-------------|
| H | 2.64908400 | -0.92809500 | 3.29610800  |
| H | 5.95874200 | -3.35363200 | 2.10616000  |
| H | 5.40297900 | -3.61925500 | -2.41604100 |
| H | 1.76406700 | -1.44701400 | -2.92702400 |

**TS-4**

|    |             |             |             |
|----|-------------|-------------|-------------|
| Y  | 2.47464000  | -0.07423900 | -0.09482400 |
| Y  | -3.32927100 | 0.55278600  | -0.01757300 |
| B  | 5.03068200  | -2.60648600 | -0.10091500 |
| B  | -6.39360800 | -1.16948100 | -0.06929000 |
| N  | 5.19438800  | -1.69273200 | 1.15282500  |
| N  | 4.35402900  | -0.61942900 | 1.40353000  |
| N  | 5.11858300  | -1.75216400 | -1.38971300 |
| N  | 4.20416000  | -0.74676000 | -1.67094600 |
| N  | 3.64404700  | -3.31756800 | -0.05114600 |
| N  | 2.45196300  | -2.61087200 | -0.02913600 |
| N  | -6.11736600 | -0.65562700 | 1.37302200  |
| N  | -4.94729200 | 0.01367600  | 1.71302400  |
| N  | -5.26147600 | -2.14403200 | -0.49034900 |
| N  | -3.94165300 | -1.72750500 | -0.54937100 |
| N  | -6.41966000 | 0.04222400  | -1.05819700 |
| N  | -5.32850500 | 0.88301500  | -1.24811600 |
| N  | 2.83358000  | 2.09637600  | 0.06671400  |
| N  | 1.20347800  | -0.88348200 | 2.12583800  |
| N  | -1.64378900 | 0.29035100  | -1.52677500 |
| Si | 4.27354300  | 3.08978700  | 0.10939500  |
| Si | 1.17111000  | 2.67704600  | 0.00443400  |
| S  | -1.62212400 | -0.90391300 | 2.06550700  |
| S  | 0.93435800  | 0.08314900  | -2.47045100 |
| C  | 6.15416600  | -1.72545100 | 2.08999600  |
| C  | 5.96017600  | -0.68366000 | 2.97072200  |
| H  | 6.55185700  | -0.42832500 | 3.81685100  |
| C  | 4.82723000  | -0.02086300 | 2.49116100  |
| C  | 5.95950200  | -1.87792700 | -2.43115300 |
| C  | 5.61358100  | -0.96767800 | -3.40126400 |
| H  | 6.07955600  | -0.81351800 | -4.34463800 |
| C  | 4.50678700  | -0.28861200 | -2.87620200 |
| C  | 3.37546600  | -4.63177400 | -0.12405500 |
| C  | 2.01127500  | -4.81077400 | -0.14596000 |
| H  | 1.47603400  | -5.72802300 | -0.20348000 |
| C  | 1.48414100  | -3.51573000 | -0.08930400 |
| C  | -6.91352200 | -0.70898800 | 2.45150800  |
| C  | -6.28938500 | -0.08341000 | 3.50722500  |
| H  | -6.65777500 | 0.04601200  | 4.49611600  |
| C  | -5.06748800 | 0.35527400  | 2.99033100  |
| C  | -5.32753500 | -3.43663200 | -0.83830000 |
| C  | -4.05882100 | -3.88913400 | -1.13039200 |



|    |             |             |             |
|----|-------------|-------------|-------------|
| H  | -3.77307600 | -4.86516800 | -1.44088600 |
| C  | -3.23166100 | -2.78072000 | -0.93481900 |
| C  | -7.43957300 | 0.49151800  | -1.80069300 |
| C  | -7.04442500 | 1.62208800  | -2.48462300 |
| H  | -7.62333600 | 2.21338700  | -3.15204500 |
| C  | -5.72022700 | 1.82710300  | -2.09920600 |
| C  | 5.85332200  | 2.16391100  | -0.46812600 |
| H  | 5.84876100  | 2.02160200  | -1.54412800 |
| H  | 6.72926100  | 2.75691100  | -0.21484300 |
| H  | 5.96124200  | 1.18878800  | -0.00855500 |
| C  | 4.16423300  | 4.65027500  | -1.01173800 |
| H  | 3.44160100  | 5.37179600  | -0.64136700 |
| H  | 5.13379300  | 5.14199400  | -1.04458700 |
| H  | 3.88444200  | 4.38894500  | -2.02800900 |
| C  | 4.65628900  | 3.78682800  | 1.86816900  |
| H  | 4.99799000  | 3.01709700  | 2.55348500  |
| H  | 5.44091700  | 4.53734400  | 1.80414100  |
| H  | 3.77908400  | 4.25747700  | 2.30295700  |
| C  | 0.70901200  | 3.79756200  | -1.47463500 |
| H  | 0.96515800  | 3.32398500  | -2.41591000 |
| H  | -0.36365500 | 3.97365600  | -1.45829900 |
| H  | 1.20657600  | 4.76032500  | -1.42538300 |
| C  | 0.64299800  | 3.58037100  | 1.60838500  |
| H  | 1.20150900  | 4.50404500  | 1.73830000  |
| H  | -0.41384100 | 3.82543000  | 1.57792000  |
| H  | 0.82526600  | 2.95997300  | 2.48321700  |
| C  | 0.09036700  | 1.06472300  | -0.02457000 |
| H  | -0.71103500 | 1.29086200  | 0.66664500  |
| C  | 0.04654700  | -0.73180800 | 1.93233300  |
| C  | -0.36973500 | 0.53214500  | -1.27433000 |
| H  | -7.45203600 | -1.72700000 | -0.10296400 |
| H  | 5.89818800  | -3.43319400 | -0.09933300 |
| Cl | -3.20132500 | 3.05083000  | 0.77826500  |
| C  | -2.02833300 | -0.19977400 | -2.87466600 |
| H  | -1.70089200 | 0.49163800  | -3.63953900 |
| H  | -1.59261600 | -1.16564400 | -3.09294500 |
| H  | -3.10753800 | -0.28528200 | -2.91664700 |
| C  | 1.94344500  | -1.67445500 | 3.16827700  |
| H  | 2.46960400  | -0.97490100 | 3.79267100  |
| H  | 1.23408000  | -2.25073900 | 3.74248200  |
| H  | 2.63746000  | -2.30616800 | 2.64765100  |
| H  | -6.25831600 | -3.95335200 | -0.85928300 |
| H  | -2.17760000 | -2.70402900 | -1.06345800 |
| H  | 4.15976500  | -5.35103900 | -0.15957800 |
| H  | 0.45983100  | -3.22119500 | -0.09692300 |
| H  | 6.91248100  | -2.47274000 | 2.07261100  |
| H  | 4.35589200  | 0.85294400  | 2.87608000  |

|   |             |             |             |
|---|-------------|-------------|-------------|
| H | 6.74002100  | -2.60239000 | -2.42155500 |
| H | 3.93009200  | 0.48983700  | -3.31943900 |
| H | -4.29623500 | 0.90181600  | 3.48232400  |
| H | -7.86730500 | -1.18033600 | 2.40606100  |
| H | -8.37958000 | -0.00863700 | -1.79975900 |
| H | -5.05715900 | 2.61002800  | -2.38931800 |

## References

1. L. E. Manzer, *Inorg. Chem.*, 1978, **17**, 1552-1558.
2. Q. You, J. Zhang and X. Zhou, *Chem. Eur. J.*, 2020, **26**, 7702-7710.
3. G. M. Sheldrick, *A short history of SHELX*, *Acta Crystallogr., Sect. A: Found. Crystallogr.* 2008, **64**, 112-122.
4. G. M. Sheldrick, *SHELXL-2014, Program for Refinement of Crystal Structures University of Göttingen, Göttingen, Germany*, 2014.
5. A. D. Becke, *J. Chem. Phys.*, 1993, **98**, 5648-5652.
6. (a) A. Bergner, M. Dolg, W. Küchle, H. Stoll and H. Preuß, *Mol. Phys.*, 1993, **80**, 1431-1441; (b) D. Andrae, A. Haeussermann, M. Dolg, H. Stoll and H. Preuss, *Theor. Chim. Acta.*, 1990, **77**, 123.
7. (a) G. A. Petersson, A. Bennett, T. G. Tensfeldt, M. A. Al-Laham, W. A. Shirley and J. Mantzaris, *J. Chem. Phys.*, 1988, **89**, 2193-2218; (b) G. A. Petersson and M. A. Al-Laham, *J. Chem. Phys.*, 1991, **94**, 6081-6090.
8. S. Grimme, S. Ehrlich and L. Goerigk, *J. Comp. Chem.*, 2011, **32**, 1456-1465.
9. A. V. Marenich, C. J. Cramer and D. G. Truhlar, *J. Phys. Chem. B*, 2009, **113**, 6378-6396.
10. M. J. Frisch, G. W. Trucks, H. B. Schlegel, G. Scuseria, E., M. A. Robb, J. R. Cheeseman and D. J. Fox, *Gaussian 16 Revision C. 01*, Gaussian Inc., Wallingford CT, 29.J.P., 2016.
